# Supplementary material for: Development and Validation of an Ability Measure of Emotion Understanding: The Core Relational Themes of Emotion (CORE) Test
Source: MDPI journal article supplement (doi:10.3390/jintelligence11100195), 2023-10-09
Supplement: s1 [file s1]

## Supplementary Materials

**Table S1**

*Emotion Understanding Ability Measures for Adults not Developed and Validated in English*

| Measure                                               | Citation                                                                                                                                                                                                                                                                                                                                                                                     |
|-------------------------------------------------------|----------------------------------------------------------------------------------------------------------------------------------------------------------------------------------------------------------------------------------------------------------------------------------------------------------------------------------------------------------------------------------------------|
| Components of Emotion Understanding Test-24 (CEUT-24) | Huyghe, Veerle E. I., Arpine Hovasapian, and Johnny R. J. Fontaine. 2022. The scoring challenge of emotional intelligence ability tests: A confirmatory factor analysis approach to model substantive and method effects using raw item scores. <i>Frontiers in Psychology</i> 13: 812525. <a href="https://doi.org/10.3389/fpsyg.2022.812525">https://doi.org/10.3389/fpsyg.2022.812525</a> |
| Empathic Agent Paradigm Test (EAPT)                   | Hellwig, Susan, Richard D. Roberts, and Ralf Schulze. 2020. A new approach to assessing emotional understanding. <i>Psychological Assessment</i> 32: 649–662. <a href="https://doi.org/10.1037/pas0000822">https://doi.org/10.1037/pas0000822</a>                                                                                                                                            |
| Mobile Emotional Intelligence Test (MEIT)             | Sanchez-Gomez, Martin, and Edgar Bresó. 2019. The Mobile Emotional Intelligence Test (MEIT): An ability test to assess emotional intelligence at work. <i>Sustainability</i> 11: 827. <a href="https://doi.org/10.3390/su11030827">https://doi.org/10.3390/su11030827</a>                                                                                                                    |
| QEPro                                                 | Haag, Christophe, Lisa Bellinghausen, and Mariya Jilinskaya-Pandey. 2023. QEPro: An ability measure of emotional intelligence for managers in a French cultural environment. <i>Current Psychology</i> 42: 4080-4102. <a href="https://doi.org/10.1007/s12144-021-01715-6">https://doi.org/10.1007/s12144-021-01715-6</a>                                                                    |
| Theory-Based Test of Emotional Understanding (TBEU)   | Hellwig, Susan, and Ralf Schulze. 2021. Emotion theories as a scoring rationale for tests of emotional understanding. <i>Personality and Individual Differences</i> 181: 111034. <a href="https://doi.org/10.1016/j.paid.2021.111034">https://doi.org/10.1016/j.paid.2021.111034</a>                                                                                                         |
| Test of Emotional Intelligence (TEMINT)               | Blickle, Gerhard, Tassilo Momm, Yongmei Liu, Alexander Witzki, and Ricarda Steinmayr. 2011. Construct validation of the Test of Emotional Intelligence (TEMINT): A two-study investigation. <i>European Journal of Psychological Assessment</i> 27: 282–289. <a href="https://doi.org/10.1027/1015-5759/a000075">https://doi.org/10.1027/1015-5759/a000075</a>                               |
| Test of Emotional Intelligence (TIE)                  | Schmidt-Atzert, L., & M. Bühner. 2002. Development of a performance measure of emotional intelligence. In 43rd congress of the German Psychological Society. Humboldt-University, Berlin, Germany.                                                                                                                                                                                           |
| Test of Emotional Intelligence (TIE)                  | Śmieja, Magdalena, Jarosław Orzechowski, and Maciej S. Stolarski. 2014. TIE: An ability test of emotional intelligence. <i>PLoS One</i> 9: e103484. <a href="https://doi.org/10.1371/journal.pone.0103484">https://doi.org/10.1371/journal.pone.0103484</a>                                                                                                                                  |

### **Study 1: The Confusion Matrix Proportion Index (Hit Rate)**

The proportion index is calculated as follows:

$$pi = \frac{P(k - 1)}{1 + P(k - 2)}$$

$P$  is the observed hit rate and  $k$  is the number of response options (i.e., 24). We used  $pi$  because it made our hit rates comparable across responses to tests with a different number of options (and so the CORE can be compared with other EU ability tests). It also renders judgments about whether the correct answers were selected above chance easier to understand (i.e., any answer selected more than  $pi = .50$ , or more than 50% of the time, is considered above chance).

**Table S2***Study 1: Participant Demographic Characteristics*

| Demographic Characteristic     | % or Mean ( <i>SD</i> ) |
|--------------------------------|-------------------------|
| <b>Age</b>                     | 38.8 (12.1)             |
| <b>Gender</b>                  |                         |
| Female                         | 55.7                    |
| Male                           | 44.3                    |
| Non-Binary Identity            | 0.0                     |
| <b>Race/Ethnicity</b>          |                         |
| White/European American        | 38.0                    |
| Latinx/Hispanic                | 22.5                    |
| Asian/Asian American           | 19.9                    |
| Black/African American         | 19.6                    |
| <b>Primary Language Spoken</b> |                         |
| English                        | 100                     |
| <b>Education Level</b>         |                         |
| High School                    | 28.8                    |
| Some College                   | 20.6                    |
| Associate's Degree             | 10.8                    |
| Bachelor's Degree              | 24.0                    |
| Master's Degree                | 12.0                    |
| Doctoral Degree                | 3.8                     |
| <b>Job Status</b>              |                         |
| Full-time (>30 hours a week)   | 100                     |
| <b>Job Type</b>                |                         |
| Other                          | 29.2                    |
| Education or Research          | 12.4                    |
| Construction or Manufacturing  | 12.3                    |
| Business or Finance            | 11.0                    |
| Managerial                     | 9.9                     |
| Tech Industry                  | 8.5                     |
| Service Sector                 | 7.6                     |
| Law or Medicine                | 6.9                     |
| Not currently employed         | 2.2                     |

*Note.* *N* = 684.

**Table S3**

*Study 1: Item-Level Raw Hit Rate (Item Difficulty) on the CORE Test (Confusion Matrix)*

| Item      | amu   | awe   | con   | gra   | hop   | ins   | int  | joy   | lov   | pro   | rel   | ang   | anx  | ash  | bor  | dis   | emb   | env  | fea   | gui  | jea  | sad  | com  | sur   |
|-----------|-------|-------|-------|-------|-------|-------|------|-------|-------|-------|-------|-------|------|------|------|-------|-------|------|-------|------|------|------|------|-------|
| amused1   | 49.3% | 0.6%  | 2.9%  | 1.2%  | 0.9%  | 1.3%  | 2.6% | 29.2% | 0.7%  | 0.7%  | 0.3%  | 0.6%  | 1.3% | 0.3% | 0.7% | 0.3%  | 0.6%  | 0.6% | 0.4%  | 0.1% | 1.0% | 0.9% | 1.8% | 1.6%  |
| amused2   | 25.7% | 3.2%  | 3.8%  | 0.9%  | 0.9%  | 0.6%  | 4.7% | 0.3%  | 0.0%  | 0.1%  | 6.0%  | 3.8%  | 6.4% | 3.2% | 3.1% | 13.9% | 3.5%  | 0.9% | 3.1%  | 0.6% | 0.0% | 1.9% | 1.8% | 11.8% |
| amused3   | 15.4% | 2.2%  | 1.6%  | 0.4%  | 0.3%  | 0.3%  | 1.0% | 0.7%  | 0.4%  | 0.6%  | 2.3%  | 9.6%  | 3.2% | 9.1% | 1.6% | 20.8% | 14.8% | 0.9% | 1.5%  | 1.8% | 0.7% | 3.7% | 1.5% | 5.7%  |
| amused4   | 16.5% | 1.8%  | 2.6%  | 0.3%  | 0.6%  | 1.2%  | 2.2% | 2.3%  | 0.7%  | 0.7%  | 0.6%  | 18.1% | 3.4% | 6.9% | 1.2% | 16.7% | 7.3%  | 1.5% | 1.3%  | 1.8% | 0.6% | 3.9% | 1.8% | 6.1%  |
| amused5   | 26.3% | 1.3%  | 0.9%  | 0.3%  | 0.3%  | 0.1%  | 0.4% | 1.3%  | 0.3%  | 0.4%  | 1.8%  | 2.3%  | 1.9% | 7.2% | 0.6% | 3.5%  | 34.4% | 0.9% | 1.3%  | 0.7% | 0.6% | 1.8% | 8.2% | 3.2%  |
| awe1      | 2.8%  | 40.8% | 1.3%  | 2.2%  | 2.0%  | 15.1% | 2.3% | 1.5%  | 0.6%  | 2.8%  | 0.7%  | 0.6%  | 5.0% | 2.2% | 0.7% | 0.7%  | 2.2%  | 4.7% | 5.1%  | 0.4% | 2.5% | 0.4% | 1.9% | 1.3%  |
| awe2      | 2.5%  | 35.5% | 1.3%  | 2.3%  | 3.4%  | 13.6% | 5.0% | 1.3%  | 0.1%  | 3.4%  | 1.0%  | 0.3%  | 6.4% | 1.2% | 0.9% | 0.4%  | 0.4%  | 2.3% | 11.5% | 0.3% | 1.0% | 0.1% | 2.3% | 3.2%  |
| awe3      | 4.1%  | 39.0% | 0.6%  | 1.0%  | 0.7%  | 2.3%  | 1.3% | 2.2%  | 0.7%  | 1.3%  | 1.0%  | 0.6%  | 3.9% | 2.0% | 1.6% | 1.2%  | 2.6%  | 0.7% | 1.3%  | 0.4% | 0.3% | 0.1% | 1.2% | 29.5% |
| content1  | 1.2%  | 1.5%  | 64.6% | 6.9%  | 1.5%  | 0.6%  | 0.4% | 3.1%  | 0.9%  | 1.8%  | 10.1% | 0.1%  | 0.6% | 0.4% | 2.9% | 0.0%  | 0.1%  | 0.7% | 0.4%  | 0.0% | 0.3% | 0.3% | 0.7% | 0.9%  |
| content2  | 0.9%  | 0.4%  | 60.1% | 5.0%  | 3.7%  | 1.5%  | 0.7% | 2.2%  | 1.5%  | 2.3%  | 10.5% | 0.4%  | 0.6% | 1.2% | 1.3% | 0.7%  | 0.9%  | 0.3% | 0.7%  | 0.6% | 0.3% | 0.4% | 2.8% | 1.0%  |
| content3  | 0.9%  | 1.0%  | 50.0% | 9.5%  | 1.3%  | 1.5%  | 0.4% | 9.1%  | 1.2%  | 9.8%  | 8.2%  | 0.1%  | 1.0% | 0.3% | 0.7% | 0.4%  | 1.2%  | 0.3% | 0.3%  | 0.3% | 0.1% | 0.6% | 1.5% | 0.3%  |
| grateful1 | 0.6%  | 3.8%  | 2.3%  | 51.2% | 1.2%  | 1.2%  | 0.6% | 5.8%  | 13.6% | 1.3%  | 1.3%  | 0.6%  | 0.3% | 0.6% | 0.7% | 0.7%  | 1.6%  | 0.3% | 1.2%  | 0.6% | 0.7% | 0.0% | 5.3% | 4.5%  |
| grateful2 | 2.0%  | 1.5%  | 9.2%  | 40.6% | 3.8%  | 1.9%  | 2.0% | 16.1% | 2.0%  | 6.0%  | 3.2%  | 0.1%  | 1.2% | 0.7% | 1.2% | 0.7%  | 0.6%  | 1.0% | 0.7%  | 0.3% | 0.3% | 0.3% | 1.3% | 3.1%  |
| grateful3 | 1.0%  | 1.9%  | 9.8%  | 48.0% | 3.9%  | 2.6%  | 1.3% | 7.5%  | 1.0%  | 10.2% | 3.4%  | 0.7%  | 1.0% | 1.0% | 0.6% | 0.6%  | 1.2%  | 0.0% | 0.9%  | 0.4% | 0.3% | 0.3% | 1.6% | 0.7%  |
| grateful4 | 1.8%  | 1.3%  | 9.9%  | 30.8% | 1.0%  | 1.5%  | 0.3% | 3.8%  | 0.6%  | 21.5% | 1.8%  | 0.4%  | 1.0% | 2.5% | 0.9% | 1.2%  | 2.3%  | 4.1% | 0.1%  | 7.0% | 2.3% | 0.9% | 2.0% | 0.9%  |
| hopeful1  | 1.6%  | 2.5%  | 5.3%  | 5.3%  | 20.3% | 32.7% | 1.6% | 6.3%  | 0.4%  | 7.6%  | 5.3%  | 0.7%  | 2.9% | 0.4% | 0.4% | 0.4%  | 0.4%  | 0.7% | 0.6%  | 0.3% | 0.1% | 0.0% | 2.3% | 1.6%  |
| hopeful2  | 0.7%  | 1.2%  | 2.2%  | 4.5%  | 39.3% | 26.9% | 5.3% | 2.8%  | 0.3%  | 2.5%  | 3.1%  | 0.1%  | 3.1% | 0.6% | 0.9% | 0.6%  | 0.4%  | 0.9% | 0.3%  | 0.1% | 0.6% | 0.3% | 2.6% | 0.7%  |
| hopeful3  | 1.9%  | 1.5%  | 6.6%  | 3.5%  | 52.9% | 4.2%  | 1.0% | 5.3%  | 0.4%  | 1.8%  | 4.7%  | 0.6%  | 7.7% | 0.4% | 0.7% | 0.6%  | 0.4%  | 0.7% | 1.2%  | 0.3% | 0.6% | 0.0% | 1.2% | 1.8%  |
| hopeful4  | 0.9%  | 1.5%  | 3.1%  | 1.9%  | 61.7% | 8.0%  | 1.2% | 1.3%  | 0.3%  | 0.6%  | 2.3%  | 0.4%  | 4.7% | 1.2% | 0.6% | 1.2%  | 0.9%  | 1.5% | 1.6%  | 0.9% | 0.1% | 0.6% | 2.5% | 1.2%  |
| inspired1 | 1.8%  | 14.6% | 2.5%  | 3.8%  | 3.7%  | 36.1% | 1.0% | 2.2%  | 1.0%  | 14.5% | 1.0%  | 0.3%  | 1.3% | 1.3% | 0.7% | 1.0%  | 0.3%  | 2.6% | 0.4%  | 0.4% | 0.9% | 0.4% | 5.8% | 2.2%  |

| Item        | amu   | awe  | con   | gra   | hop  | ins   | int   | joy   | lov   | pro   | rel   | ang   | anx   | ash  | bor  | dis   | emb  | env  | fea   | gui  | jea   | sad   | com   | sur   |
|-------------|-------|------|-------|-------|------|-------|-------|-------|-------|-------|-------|-------|-------|------|------|-------|------|------|-------|------|-------|-------|-------|-------|
| inspired2   | 1.5%  | 5.7% | 2.2%  | 4.7%  | 5.1% | 32.9% | 1.5%  | 4.7%  | 0.3%  | 15.1% | 4.5%  | 1.2%  | 1.6%  | 1.3% | 1.0% | 0.7%  | 0.7% | 2.0% | 1.8%  | 0.4% | 1.8%  | 2.0%  | 5.3%  | 2.0%  |
| interested1 | 6.9%  | 6.0% | 4.5%  | 2.3%  | 2.9% | 7.6%  | 51.5% | 2.0%  | 0.9%  | 1.2%  | 1.0%  | 0.4%  | 2.6%  | 0.7% | 1.3% | 0.4%  | 0.6% | 0.9% | 0.9%  | 0.1% | 0.3%  | 0.6%  | 2.0%  | 2.2%  |
| interested2 | 9.4%  | 8.0% | 1.5%  | 1.5%  | 2.8% | 4.8%  | 35.5% | 2.6%  | 0.3%  | 2.2%  | 0.6%  | 0.4%  | 6.0%  | 1.0% | 0.7% | 1.3%  | 0.6% | 0.9% | 1.2%  | 0.1% | 0.7%  | 0.3%  | 0.7%  | 16.8% |
| joy1        | 3.2%  | 1.3% | 14.9% | 13.5% | 9.6% | 3.8%  | 0.6%  | 27.3% | 1.3%  | 7.2%  | 7.9%  | 0.3%  | 0.7%  | 0.6% | 0.7% | 0.7%  | 0.4% | 0.4% | 0.7%  | 0.0% | 0.6%  | 0.7%  | 1.8%  | 1.6%  |
| joy2        | 3.4%  | 1.8% | 5.6%  | 13.2% | 3.1% | 2.2%  | 0.6%  | 46.3% | 1.2%  | 4.1%  | 6.3%  | 0.1%  | 1.3%  | 0.9% | 0.4% | 0.4%  | 0.4% | 0.3% | 0.4%  | 0.1% | 0.1%  | 0.0%  | 2.2%  | 5.6%  |
| joy3        | 13.9% | 1.3% | 8.9%  | 5.4%  | 1.9% | 3.9%  | 8.0%  | 37.1% | 1.8%  | 0.9%  | 4.8%  | 0.1%  | 2.2%  | 0.7% | 1.3% | 0.9%  | 0.4% | 1.0% | 0.7%  | 0.3% | 0.9%  | 0.4%  | 1.9%  | 1.0%  |
| joy4        | 17.4% | 1.3% | 6.7%  | 1.8%  | 1.5% | 1.0%  | 4.4%  | 53.7% | 0.3%  | 2.3%  | 1.0%  | 0.1%  | 0.6%  | 0.6% | 0.4% | 0.9%  | 0.6% | 0.6% | 0.3%  | 0.7% | 0.7%  | 0.0%  | 1.8%  | 1.3%  |
| loved1      | 1.0%  | 1.9% | 11.8% | 15.4% | 1.5% | 2.0%  | 0.9%  | 5.4%  | 38.9% | 2.6%  | 8.0%  | 0.1%  | 0.6%  | 0.4% | 1.0% | 0.9%  | 0.4% | 0.6% | 0.1%  | 0.3% | 0.0%  | 0.3%  | 4.8%  | 0.9%  |
| loved2      | 1.5%  | 4.7% | 2.2%  | 13.6% | 0.9% | 6.4%  | 9.1%  | 8.0%  | 26.2% | 5.0%  | 0.6%  | 0.9%  | 1.8%  | 0.9% | 1.2% | 0.3%  | 1.8% | 1.0% | 0.6%  | 0.3% | 0.3%  | 0.4%  | 10.7% | 1.9%  |
| loved3      | 0.9%  | 2.2% | 4.0%  | 33.5% | 1.9% | 1.0%  | 0.0%  | 1.9%  | 37.9% | 1.3%  | 4.1%  | 0.1%  | 0.1%  | 1.8% | 0.7% | 1.0%  | 0.7% | 0.4% | 0.4%  | 0.3% | 0.1%  | 0.4%  | 4.5%  | 0.4%  |
| loved4      | 2.8%  | 5.0% | 6.4%  | 13.2% | 0.6% | 4.4%  | 5.6%  | 4.2%  | 32.2% | 4.2%  | 1.9%  | 0.3%  | 1.5%  | 1.8% | 1.2% | 0.7%  | 3.2% | 2.0% | 0.3%  | 0.3% | 1.6%  | 0.4%  | 3.4%  | 2.9%  |
| loved5      | 1.8%  | 3.1% | 2.9%  | 22.5% | 8.0% | 6.0%  | 2.2%  | 2.0%  | 30.6% | 3.7%  | 1.2%  | 0.7%  | 1.3%  | 1.0% | 0.4% | 0.7%  | 1.0% | 0.4% | 1.2%  | 0.6% | 0.9%  | 0.4%  | 6.0%  | 1.3%  |
| proud1      | 0.6%  | 1.0% | 7.6%  | 7.7%  | 3.9% | 6.3%  | 0.3%  | 2.6%  | 0.1%  | 57.7% | 2.9%  | 0.9%  | 0.4%  | 0.9% | 1.3% | 0.7%  | 0.3% | 0.3% | 0.3%  | 0.6% | 0.0%  | 0.4%  | 2.5%  | 0.4%  |
| proud2      | 1.5%  | 1.3% | 8.0%  | 6.9%  | 1.2% | 5.8%  | 1.0%  | 11.3% | 0.3%  | 47.4% | 6.9%  | 0.4%  | 1.3%  | 0.4% | 0.6% | 1.5%  | 0.1% | 0.9% | 0.3%  | 0.1% | 0.1%  | 0.0%  | 1.2%  | 1.5%  |
| proud3      | 5.1%  | 2.5% | 5.3%  | 1.3%  | 0.3% | 2.5%  | 0.3%  | 2.0%  | 1.3%  | 44.2% | 1.8%  | 1.9%  | 1.3%  | 3.8% | 0.9% | 2.3%  | 1.5% | 9.4% | 0.0%  | 3.1% | 6.4%  | 0.4%  | 1.9%  | 0.6%  |
| proud4      | 2.2%  | 3.8% | 8.9%  | 4.8%  | 2.9% | 6.9%  | 2.9%  | 5.1%  | 6.9%  | 36.5% | 1.5%  | 0.4%  | 2.2%  | 1.9% | 0.9% | 0.1%  | 1.5% | 3.4% | 0.9%  | 0.3% | 0.6%  | 0.3%  | 3.5%  | 1.6%  |
| relieved1   | 1.3%  | 2.0% | 2.0%  | 10.7% | 1.5% | 0.7%  | 0.0%  | 2.8%  | 0.4%  | 0.0%  | 54.8% | 2.6%  | 3.2%  | 1.0% | 1.6% | 2.5%  | 1.3% | 0.1% | 1.5%  | 1.2% | 0.4%  | 4.2%  | 1.2%  | 2.8%  |
| relieved2   | 1.6%  | 0.7% | 3.1%  | 10.1% | 2.2% | 0.6%  | 0.7%  | 4.8%  | 0.3%  | 1.6%  | 56.3% | 2.9%  | 1.9%  | 1.2% | 1.0% | 1.6%  | 1.2% | 0.7% | 0.7%  | 0.7% | 0.7%  | 4.1%  | 0.7%  | 0.4%  |
| relieved3   | 2.0%  | 2.0% | 4.5%  | 11.0% | 2.0% | 0.3%  | 1.0%  | 1.9%  | 0.4%  | 1.0%  | 52.0% | 0.7%  | 1.9%  | 1.0% | 1.5% | 1.6%  | 0.7% | 0.7% | 0.3%  | 0.1% | 0.4%  | 0.9%  | 1.2%  | 10.5% |
| angry1      | 0.4%  | 1.0% | 2.0%  | 1.5%  | 1.8% | 1.6%  | 1.0%  | 0.7%  | 0.7%  | 1.2%  | 0.7%  | 50.3% | 11.1% | 1.3% | 1.0% | 5.7%  | 0.4% | 4.2% | 2.6%  | 0.6% | 1.9%  | 6.0%  | 0.9%  | 1.2%  |
| angry2      | 0.6%  | 0.9% | 0.4%  | 0.1%  | 0.3% | 0.6%  | 0.3%  | 0.3%  | 0.1%  | 0.6%  | 1.0%  | 55.4% | 2.6%  | 2.6% | 0.9% | 10.2% | 0.7% | 3.2% | 1.3%  | 1.2% | 3.4%  | 10.8% | 1.3%  | 1.0%  |
| angry3      | 0.6%  | 0.7% | 0.6%  | 0.7%  | 0.3% | 0.1%  | 0.0%  | 0.6%  | 0.3%  | 0.3%  | 1.2%  | 43.6% | 2.0%  | 1.8% | 0.6% | 4.5%  | 1.0% | 0.9% | 21.8% | 1.0% | 0.006 | 15.4% | 0.4%  | 1.0%  |
| angry4      | 0.9%  | 1.5% | 1.2%  | 0.6%  | 0.1% | 0.4%  | 0.0%  | 0.3%  | 0.7%  | 0.7%  | 0.4%  | 61.3% | 1.6%  | 2.9% | 0.9% | 9.5%  | 4.4% | 0.6% | 1.0%  | 0.6% | 0.3%  | 6.9%  | 1.2%  | 2.0%  |

| Item         | amu  | awe  | con  | gra  | hop   | ins  | int  | joy  | lov  | pro  | rel  | ang   | anx   | ash   | bor   | dis   | emb   | env   | fea   | gui  | jea   | sad  | com  | sur  |
|--------------|------|------|------|------|-------|------|------|------|------|------|------|-------|-------|-------|-------|-------|-------|-------|-------|------|-------|------|------|------|
| anxious1     | 0.6% | 2.6% | 2.3% | 0.7% | 3.9%  | 0.3% | 1.5% | 0.3% | 0.1% | 0.3% | 0.4% | 1.3%  | 61.5% | 1.3%  | 2.0%  | 1.9%  | 0.4%  | 1.0%  | 11.3% | 0.6% | 0.4%  | 1.9% | 0.4% | 2.6% |
| anxious2     | 0.7% | 0.9% | 0.4% | 0.1% | 0.7%  | 0.3% | 0.1% | 0.0% | 0.4% | 0.3% | 0.3% | 3.7%  | 50.0% | 2.5%  | 1.2%  | 1.9%  | 1.3%  | 0.3%  | 23.8% | 1.9% | 0.3%  | 6.6% | 1.2% | 1.0% |
| anxious3     | 0.4% | 1.2% | 0.9% | 0.6% | 0.6%  | 0.1% | 1.5% | 0.3% | 0.4% | 0.3% | 0.7% | 2.0%  | 52.6% | 2.2%  | 0.7%  | 2.6%  | 2.5%  | 1.2%  | 23.0% | 1.8% | 0.4%  | 1.8% | 1.6% | 0.6% |
| ashamed1     | 1.0% | 1.2% | 1.8% | 0.1% | 0.4%  | 0.7% | 0.6% | 0.6% | 0.7% | 1.5% | 0.9% | 5.6%  | 5.6%  | 41.8% | 0.7%  | 9.2%  | 8.9%  | 1.3%  | 1.3%  | 9.2% | 0.6%  | 3.5% | 1.3% | 1.5% |
| ashamed2     | 1.0% | 1.6% | 1.8% | 0.6% | 0.7%  | 1.8% | 0.3% | 0.0% | 0.6% | 1.2% | 0.4% | 2.2%  | 2.8%  | 44.4% | 1.5%  | 8.2%  | 11.8% | 0.9%  | 0.9%  | 5.7% | 0.3%  | 9.5% | 1.0% | 0.9% |
| ashamed3     | 0.9% | 1.5% | 2.3% | 0.6% | 0.9%  | 0.3% | 0.3% | 0.4% | 0.7% | 0.9% | 1.2% | 2.3%  | 1.6%  | 52.3% | 0.9%  | 5.6%  | 8.6%  | 0.9%  | 0.9%  | 7.3% | 0.7%  | 7.2% | 1.3% | 0.4% |
| bored1       | 0.6% | 1.3% | 6.6% | 1.2% | 1.5%  | 0.6% | 0.3% | 0.1% | 0.4% | 0.0% | 2.3% | 3.8%  | 10.2% | 2.0%  | 48.4% | 4.1%  | 1.8%  | 1.0%  | 2.0%  | 0.7% | 0.4%  | 8.2% | 1.5% | 0.9% |
| bored2       | 2.2% | 2.3% | 9.2% | 1.2% | 1.2%  | 1.0% | 2.9% | 0.4% | 0.3% | 0.6% | 3.5% | 1.0%  | 3.7%  | 1.6%  | 58.2% | 1.2%  | 0.7%  | 0.9%  | 0.9%  | 0.7% | 0.4%  | 2.8% | 6.0% | 2.5% |
| bored3       | 2.6% | 2.2% | 4.1% | 0.4% | 0.3%  | 0.6% | 1.3% | 0.3% | 0.1% | 0.0% | 2.3% | 2.3%  | 4.1%  | 1.8%  | 60.8% | 2.6%  | 1.6%  | 1.5%  | 0.9%  | 1.5% | 0.9%  | 2.2% | 1.3% | 4.2% |
| bored4       | 2.9% | 1.0% | 4.8% | 2.3% | 0.6%  | 2.0% | 2.3% | 2.8% | 0.3% | 3.5% | 9.6% | 0.4%  | 2.2%  | 1.3%  | 52.2% | 0.3%  | 1.3%  | 1.8%  | 0.3%  | 0.9% | 0.7%  | 0.3% | 1.0% | 5.0% |
| disgusted1   | 0.6% | 0.7% | 0.4% | 0.6% | 0.1%  | 0.4% | 0.4% | 0.3% | 0.3% | 0.6% | 0.4% | 11.5% | 10.7% | 2.8%  | 1.6%  | 34.6% | 0.9%  | 0.7%  | 25.7% | 1.0% | 0.4%  | 3.8% | 0.3% | 0.9% |
| disgusted2   | 1.3% | 1.3% | 0.7% | 0.3% | 1.0%  | 0.4% | 0.1% | 0.4% | 0.0% | 0.6% | 0.7% | 1.5%  | 0.9%  | 2.5%  | 0.9%  | 78.2% | 1.8%  | 0.9%  | 1.5%  | 0.9% | 0.1%  | 1.3% | 0.7% | 1.9% |
| disgusted3   | 1.5% | 1.2% | 0.9% | 0.7% | 0.4%  | 0.3% | 0.1% | 0.3% | 0.1% | 1.0% | 0.9% | 23.7% | 1.9%  | 13.2% | 1.2%  | 35.1% | 3.8%  | 1.0%  | 2.5%  | 1.5% | 0.4%  | 3.9% | 1.0% | 3.4% |
| disgusted4   | 1.5% | 1.9% | 1.2% | 0.6% | 0.1%  | 0.4% | 0.7% | 0.1% | 0.6% | 0.7% | 0.6% | 18.7% | 2.0%  | 12.1% | 0.4%  | 31.6% | 18.0% | 0.4%  | 0.7%  | 1.0% | 0.3%  | 2.8% | 0.9% | 2.5% |
| disgusted5   | 1.6% | 2.2% | 2.9% | 0.4% | 0.7%  | 0.0% | 0.4% | 0.4% | 0.7% | 0.6% | 0.9% | 22.4% | 4.5%  | 1.2%  | 2.9%  | 39.9% | 2.6%  | 3.4%  | 1.0%  | 1.5% | 2.5%  | 5.0% | 2.6% | 1.2% |
| embarrassed1 | 1.3% | 1.2% | 1.2% | 0.4% | 0.7%  | 0.4% | 0.3% | 0.7% | 0.1% | 0.6% | 0.7% | 0.3%  | 3.2%  | 16.7% | 0.7%  | 1.3%  | 65.5% | 0.4%  | 1.0%  | 0.1% | 0.0%  | 0.6% | 1.6% | 0.7% |
| embarrassed2 | 0.6% | 0.9% | 0.9% | 0.9% | 0.7%  | 0.7% | 0.0% | 0.3% | 0.4% | 0.7% | 0.9% | 8.6%  | 4.8%  | 20.2% | 1.5%  | 1.9%  | 48.2% | 0.7%  | 1.8%  | 0.7% | 0.6%  | 1.3% | 0.9% | 1.8% |
| embarrassed3 | 2.3% | 4.5% | 1.8% | 6.4% | 0.6%  | 3.2% | 0.4% | 3.1% | 3.2% | 6.6% | 0.7% | 2.5%  | 3.1%  | 4.5%  | 1.0%  | 3.4%  | 37.4% | 1.5%  | 0.4%  | 1.6% | 0.7%  | 1.8% | 1.5% | 7.7% |
| envy1        | 0.7% | 1.0% | 1.8% | 0.4% | 3.2%  | 1.9% | 2.5% | 0.1% | 0.6% | 1.0% | 1.3% | 4.7%  | 3.4%  | 0.9%  | 1.3%  | 1.3%  | 1.0%  | 38.5% | 0.7%  | 0.7% | 30.1% | 0.7% | 1.2% | 0.9% |
| envy2        | 1.5% | 2.9% | 1.5% | 2.2% | 1.5%  | 3.4% | 4.2% | 1.5% | 0.7% | 1.3% | 0.3% | 0.6%  | 1.3%  | 0.7%  | 0.1%  | 0.9%  | 0.9%  | 41.3% | 0.3%  | 0.3% | 29.1% | 0.1% | 2.0% | 1.3% |
| envy3        | 1.2% | 1.5% | 1.6% | 0.4% | 12.3% | 2.5% | 2.0% | 0.3% | 0.4% | 0.6% | 0.9% | 0.6%  | 3.9%  | 1.3%  | 1.0%  | 1.0%  | 0.6%  | 41.4% | 0.4%  | 1.8% | 17.7% | 5.0% | 1.3% | 0.3% |
| fear1        | 0.6% | 0.7% | 1.2% | 0.4% | 0.4%  | 0.6% | 0.3% | 0.3% | 0.0% | 0.7% | 0.0% | 8.8%  | 15.9% | 1.6%  | 1.3%  | 1.3%  | 0.7%  | 1.2%  | 58.5% | 0.1% | 1.3%  | 1.6% | 0.9% | 1.5% |
| fear2        | 0.7% | 0.6% | 1.0% | 0.6% | 0.4%  | 0.4% | 0.1% | 0.6% | 0.1% | 1.2% | 1.2% | 5.0%  | 13.7% | 1.0%  | 0.7%  | 1.0%  | 0.9%  | 0.7%  | 62.5% | 0.4% | 0.1%  | 3.1% | 1.6% | 2.0% |

| Item           | amu  | awe  | con  | gra  | hop  | ins  | int  | joy  | lov  | pro  | rel  | ang   | anx   | ash   | bor  | dis  | emb   | env   | fea  | gui   | jea   | sad   | com   | sur   |
|----------------|------|------|------|------|------|------|------|------|------|------|------|-------|-------|-------|------|------|-------|-------|------|-------|-------|-------|-------|-------|
| guilty1        | 0.6% | 1.2% | 1.2% | 0.3% | 0.4% | 0.3% | 0.6% | 0.6% | 0.6% | 0.7% | 0.9% | 4.2%  | 1.8%  | 31.9% | 0.4% | 1.9% | 5.0%  | 0.3%  | 1.6% | 34.2% | 0.3%  | 8.3%  | 1.9%  | 0.9%  |
| guilty2        | 0.3% | 0.7% | 1.5% | 0.3% | 0.1% | 0.0% | 0.3% | 0.3% | 0.3% | 0.4% | 0.1% | 5.3%  | 2.5%  | 39.8% | 1.0% | 4.5% | 25.1% | 0.3%  | 0.9% | 10.8% | 0.7%  | 1.6%  | 0.9%  | 2.2%  |
| jealous1       | 1.0% | 1.8% | 0.9% | 0.9% | 0.6% | 1.0% | 0.4% | 0.6% | 0.9% | 0.6% | 0.6% | 3.9%  | 1.8%  | 1.0%  | 0.6% | 1.6% | 1.5%  | 16.5% | 1.6% | 0.4%  | 49.7% | 9.1%  | 2.0%  | 1.0%  |
| jealous2       | 0.3% | 1.0% | 1.8% | 0.7% | 0.4% | 0.7% | 0.1% | 0.9% | 1.0% | 0.4% | 0.4% | 4.5%  | 1.0%  | 1.0%  | 3.4% | 0.9% | 1.5%  | 14.5% | 1.2% | 0.3%  | 56.6% | 4.2%  | 1.5%  | 1.6%  |
| jealous3       | 1.5% | 1.0% | 0.7% | 1.8% | 0.9% | 0.6% | 2.5% | 0.9% | 4.2% | 0.9% | 0.9% | 2.2%  | 1.9%  | 2.2%  | 1.0% | 1.2% | 1.3%  | 18.0% | 0.6% | 0.1%  | 49.9% | 1.9%  | 3.1%  | 0.9%  |
| sad1           | 0.7% | 1.5% | 1.0% | 0.0% | 0.1% | 0.6% | 0.6% | 0.3% | 0.7% | 0.3% | 0.6% | 23.0% | 4.1%  | 5.6%  | 1.0% | 5.8% | 2.9%  | 1.0%  | 0.4% | 1.8%  | 1.0%  | 42.3% | 0.6%  | 4.1%  |
| sad2           | 0.7% | 0.6% | 0.7% | 0.7% | 0.4% | 0.3% | 0.3% | 0.3% | 0.4% | 0.4% | 0.9% | 7.7%  | 2.2%  | 0.9%  | 1.5% | 2.0% | 0.7%  | 0.6%  | 2.2% | 1.3%  | 0.7%  | 71.8% | 1.3%  | 1.2%  |
| compassionate1 | 0.9% | 1.5% | 0.6% | 0.0% | 0.3% | 0.7% | 0.4% | 0.0% | 0.1% | 0.6% | 1.0% | 1.5%  | 1.9%  | 0.9%  | 1.0% | 1.5% | 0.4%  | 0.7%  | 3.8% | 3.8%  | 0.1%  | 30.0% | 48.1% | 0.1%  |
| compassionate2 | 1.2% | 0.9% | 1.0% | 3.9% | 3.4% | 4.1% | 4.7% | 0.3% | 1.6% | 2.8% | 1.6% | 1.2%  | 3.1%  | 1.5%  | 1.3% | 1.0% | 1.9%  | 0.7%  | 0.4% | 0.9%  | 0.1%  | 2.3%  | 59.6% | 0.4%  |
| compassionate3 | 0.3% | 1.5% | 1.3% | 3.0% | 7.0% | 3.0% | 7.0% | 7.0% | 1.0% | 3.0% | 7.0% | 17.1% | 2.6%  | 3.2%  | 1.5% | 5.4% | 1.8%  | 1.2%  | 1.0% | 4.2%  | 7.0%  | 22.4% | 30.8% | 1.0%  |
| surprised1     | 1.0% | 3.2% | 0.4% | 1.2% | 1.2% | 0.9% | 1.2% | 0.6% | 0.4% | 0.6% | 1.2% | 9.0%  | 10.8% | 1.5%  | 0.9% | 1.5% | 0.7%  | 0.6%  | 2.2% | 0.6%  | 0.0%  | 1.2%  | 0.9%  | 66.5% |
| surprised2     | 1.8% | 2.8% | 0.9% | 1.3% | 1.5% | 0.9% | 0.7% | 0.6% | 0.7% | 0.6% | 0.9% | 0.7%  | 6.9%  | 0.9%  | 1.3% | 1.2% | 0.9%  | 0.3%  | 4.5% | 0.3%  | 0.0%  | 0.1%  | 0.9%  | 69.0% |

*Note:* Greyed cells indicate raw hit rates for the item-level target responses.

Table S4

*Study 1: Emotion-Level Raw Hit Rate (Item Difficulty) on the CORE Test (Confusion Matrix)*

| Emotion     | amu   | awe   | con   | gra   | hop   | ins   | int   | joy   | lov   | pro   | Rel   | ang   | anx   | ash   | bor   | dis   | emb   | env   | fea   | gui   | jea   | sad  | com  | sur   |
|-------------|-------|-------|-------|-------|-------|-------|-------|-------|-------|-------|-------|-------|-------|-------|-------|-------|-------|-------|-------|-------|-------|------|------|-------|
| amused      | 26.6% | 1.8%  | 2.4%  | 0.6%  | 0.6%  | 0.7%  | 2.2%  | 6.8%  | 0.4%  | 0.5%  | 2.2%  | 6.9%  | 3.2%  | 5.3%  | 1.4%  | 11.0% | 12.1% | 1.0%  | 1.5%  | 1.0%  | 0.6%  | 2.4% | 3.0% | 5.7%  |
| awed        | 3.1%  | 38.4% | 1.1%  | 1.8%  | 2.0%  | 10.3% | 2.9%  | 1.7%  | 0.5%  | 2.5%  | 0.9%  | 0.5%  | 5.1%  | 1.8%  | 1.1%  | 0.8%  | 1.7%  | 2.6%  | 6.0%  | 0.4%  | 1.3%  | 0.2% | 1.8% | 11.3% |
| content     | 1.0%  | 1.0%  | 58.2% | 7.1%  | 2.2%  | 1.2%  | 0.5%  | 4.8%  | 1.2%  | 4.6%  | 9.6%  | 0.2%  | 0.7%  | 0.6%  | 1.6%  | 0.4%  | 0.7%  | 0.4%  | 0.5%  | 0.3%  | 0.2%  | 0.4% | 1.7% | 0.7%  |
| grateful    | 1.4%  | 2.1%  | 7.8%  | 42.7% | 2.5%  | 1.8%  | 1.1%  | 8.3%  | 4.3%  | 9.8%  | 2.4%  | 0.5%  | 0.9%  | 1.2%  | 0.9%  | 0.8%  | 1.4%  | 1.4%  | 0.7%  | 2.1%  | 0.9%  | 0.4% | 2.6% | 2.3%  |
| hopeful     | 1.3%  | 1.7%  | 4.3%  | 3.8%  | 43.6% | 18.0% | 2.3%  | 3.9%  | 0.4%  | 3.1%  | 3.9%  | 0.5%  | 4.6%  | 0.7%  | 0.7%  | 0.7%  | 0.5%  | 1.0%  | 0.9%  | 0.4%  | 0.4%  | 0.2% | 2.2% | 1.3%  |
| inspired    | 1.7%  | 10.2% | 2.4%  | 4.3%  | 4.4%  | 34.5% | 1.3%  | 3.5%  | 0.7%  | 14.8% | 2.8%  | 0.8%  | 1.5%  | 1.3%  | 0.9%  | 0.9%  | 0.5%  | 2.3%  | 1.1%  | 0.4%  | 1.4%  | 1.2% | 5.6% | 2.1%  |
| interested  | 8.2%  | 7.0%  | 3.0%  | 1.9%  | 2.9%  | 6.2%  | 43.5% | 2.3%  | 0.6%  | 1.7%  | 0.8%  | 0.4%  | 4.3%  | 0.9%  | 1.0%  | 0.9%  | 0.6%  | 0.9%  | 1.1%  | 0.1%  | 0.5%  | 0.5% | 1.4% | 9.5%  |
| joyful      | 9.5%  | 1.4%  | 9.0%  | 8.5%  | 4.0%  | 2.7%  | 3.4%  | 41.1% | 1.2%  | 3.6%  | 5.0%  | 0.2%  | 1.2%  | 0.7%  | 0.7%  | 0.7%  | 0.5%  | 0.6%  | 0.5%  | 0.3%  | 0.6%  | 0.3% | 1.9% | 2.4%  |
| loved       | 1.6%  | 3.4%  | 5.5%  | 19.6% | 2.6%  | 4.0%  | 3.6%  | 4.3%  | 33.2% | 3.4%  | 3.2%  | 0.4%  | 1.1%  | 1.2%  | 0.9%  | 0.7%  | 1.4%  | 0.9%  | 0.5%  | 0.4%  | 0.6%  | 0.4% | 5.9% | 1.5%  |
| proud       | 2.4%  | 2.2%  | 7.5%  | 5.2%  | 2.1%  | 5.4%  | 1.1%  | 5.3%  | 2.2%  | 46.5% | 3.3%  | 0.9%  | 1.3%  | 1.8%  | 0.9%  | 1.2%  | 0.9%  | 3.5%  | 0.4%  | 1.0%  | 1.8%  | 0.3% | 2.3% | 1.0%  |
| relieved    | 1.6%  | 1.6%  | 3.2%  | 10.6% | 1.9%  | 0.5%  | 0.6%  | 3.2%  | 0.4%  | 0.9%  | 54.4% | 2.1%  | 2.3%  | 1.1%  | 1.4%  | 1.9%  | 1.1%  | 0.5%  | 0.8%  | 0.7%  | 0.5%  | 3.1% | 1.0% | 4.6%  |
| angry       | 0.6%  | 1.0%  | 1.1%  | 0.7%  | 0.6%  | 0.7%  | 0.3%  | 0.5%  | 0.5%  | 0.7%  | 0.8%  | 52.7% | 4.3%  | 2.2%  | 0.9%  | 7.5%  | 1.6%  | 2.2%  | 6.7%  | 0.9%  | 1.6%  | 9.8% | 1.0% | 1.3%  |
| anxious     | 0.6%  | 1.6%  | 1.2%  | 0.5%  | 1.7%  | 0.2%  | 1.0%  | 0.2%  | 0.3%  | 0.3%  | 0.5%  | 2.3%  | 54.7% | 2.0%  | 1.3%  | 2.1%  | 1.4%  | 0.8%  | 19.4% | 1.4%  | 0.4%  | 3.4% | 1.1% | 1.4%  |
| ashamed     | 1.0%  | 1.4%  | 2.0%  | 0.4%  | 0.7%  | 0.9%  | 0.4%  | 0.3%  | 0.7%  | 1.2%  | 0.8%  | 3.4%  | 3.3%  | 46.2% | 1.0%  | 7.7%  | 9.8%  | 1.0%  | 1.0%  | 7.4%  | 0.5%  | 6.7% | 1.2% | 0.9%  |
| bored       | 2.1%  | 1.7%  | 6.2%  | 1.3%  | 0.9%  | 1.1%  | 1.7%  | 0.9%  | 0.3%  | 1.0%  | 4.4%  | 1.9%  | 5.1%  | 1.7%  | 54.9% | 2.1%  | 1.4%  | 1.3%  | 1.0%  | 1.0%  | 0.6%  | 3.4% | 2.5% | 3.2%  |
| disgusted   | 1.3%  | 1.5%  | 1.2%  | 0.5%  | 0.5%  | 0.3%  | 0.3%  | 0.3%  | 0.3%  | 0.7%  | 0.7%  | 15.6% | 4.0%  | 6.4%  | 1.4%  | 43.9% | 5.4%  | 1.3%  | 6.3%  | 1.2%  | 0.7%  | 3.4% | 1.1% | 2.0%  |
| embarrassed | 1.4%  | 2.2%  | 1.3%  | 2.6%  | 0.7%  | 1.4%  | 0.2%  | 1.4%  | 1.2%  | 2.6%  | 0.8%  | 3.8%  | 3.7%  | 13.8% | 1.1%  | 2.2%  | 50.4% | 0.9%  | 1.1%  | 0.8%  | 0.4%  | 1.2% | 1.3% | 3.4%  |
| envious     | 1.1%  | 1.8%  | 1.6%  | 1.0%  | 5.7%  | 2.6%  | 2.9%  | 0.6%  | 0.6%  | 1.0%  | 0.8%  | 2.0%  | 2.9%  | 1.0%  | 0.8%  | 1.1%  | 0.8%  | 40.4% | 0.5%  | 0.9%  | 25.6% | 1.9% | 1.5% | 0.8%  |
| fearful     | 0.7%  | 0.7%  | 1.1%  | 0.5%  | 0.4%  | 0.5%  | 0.2%  | 0.5%  | 0.1%  | 1.0%  | 0.6%  | 6.9%  | 14.8% | 1.3%  | 1.0%  | 1.2%  | 0.8%  | 1.0%  | 60.5% | 0.3%  | 0.7%  | 2.4% | 1.3% | 1.8%  |
| guilty      | 0.5%  | 1.0%  | 1.4%  | 0.3%  | 0.3%  | 0.2%  | 0.5%  | 0.5%  | 0.5%  | 0.6%  | 0.5%  | 4.8%  | 2.2%  | 35.9% | 0.7%  | 3.2%  | 15.1% | 0.3%  | 1.3%  | 22.5% | 0.5%  | 5.0% | 1.4% | 1.6%  |



| Emotion       | amu  | awe  | con  | gra  | hop  | ins  | int  | joy  | lov  | pro  | Rel  | ang   | anx  | ash  | bor  | dis  | emb  | env   | fea  | gui  | jea   | sad   | com   | sur   |
|---------------|------|------|------|------|------|------|------|------|------|------|------|-------|------|------|------|------|------|-------|------|------|-------|-------|-------|-------|
| jealous       | 0.9% | 1.3% | 1.1% | 1.1% | 0.6% | 0.8% | 1.0% | 0.8% | 2.0% | 0.6% | 0.6% | 3.5%  | 1.6% | 1.4% | 1.7% | 1.2% | 1.4% | 16.3% | 1.1% | 0.3% | 52.1% | 5.1%  | 2.2%  | 1.2%  |
| sad           | 0.7% | 1.1% | 0.9% | 0.4% | 0.3% | 0.5% | 0.5% | 0.3% | 0.6% | 0.4% | 0.8% | 15.4% | 3.2% | 3.3% | 1.3% | 3.9% | 1.8% | 0.8%  | 1.3% | 1.6% | 0.9%  | 57.1% | 1.0%  | 2.7%  |
| compassionate | 0.8% | 1.3% | 1.0% | 2.3% | 3.6% | 2.6% | 4.0% | 2.4% | 0.9% | 2.1% | 3.2% | 6.6%  | 2.5% | 1.9% | 1.3% | 2.6% | 1.4% | 0.9%  | 1.7% | 3.0% | 2.4%  | 18.2% | 46.2% | 0.5%  |
| surprised     | 1.4% | 3.0% | 0.7% | 1.3% | 1.4% | 0.9% | 1.0% | 0.6% | 0.6% | 0.6% | 1.1% | 4.9%  | 8.9% | 1.2% | 1.1% | 1.4% | 0.8% | 0.5%  | 3.4% | 0.5% | 0.0%  | 0.7%  | 0.9%  | 67.8% |

*Note:* Greyed cells indicate raw hit rates for the emotion-level target responses.

**Table S5***Study 1: Item-Level Chance-Adjusted Hit Rate (Item Difficulty) on the CORE Test (Confusion Matrix)*

| Item      | amu  | awe  | con  | gra  | hop  | ins  | int  | joy  | lov  | pro  | rel  | ang  | anx  | ash  | bor  | dis  | emb  | env  | fea  | gui  | jea  | sad  | com  | sur  |
|-----------|------|------|------|------|------|------|------|------|------|------|------|------|------|------|------|------|------|------|------|------|------|------|------|------|
| amused1   | 0.96 | 0.12 | 0.40 | 0.21 | 0.17 | 0.22 | 0.37 | 0.90 | 0.13 | 0.13 | 0.06 | 0.12 | 0.22 | 0.06 | 0.13 | 0.06 | 0.12 | 0.12 | 0.08 | 0.02 | 0.18 | 0.17 | 0.29 | 0.26 |
| amused2   | 0.88 | 0.42 | 0.46 | 0.17 | 0.17 | 0.12 | 0.52 | 0.06 | 0.00 | 0.02 | 0.58 | 0.46 | 0.60 | 0.42 | 0.41 | 0.78 | 0.44 | 0.17 | 0.41 | 0.12 | 0.00 | 0.30 | 0.29 | 0.75 |
| amused3   | 0.80 | 0.33 | 0.26 | 0.08 | 0.06 | 0.06 | 0.18 | 0.13 | 0.08 | 0.12 | 0.34 | 0.70 | 0.42 | 0.69 | 0.26 | 0.85 | 0.79 | 0.17 | 0.25 | 0.29 | 0.13 | 0.46 | 0.25 | 0.57 |
| amused4   | 0.81 | 0.29 | 0.37 | 0.06 | 0.12 | 0.21 | 0.33 | 0.34 | 0.13 | 0.13 | 0.12 | 0.83 | 0.44 | 0.62 | 0.21 | 0.82 | 0.63 | 0.25 | 0.22 | 0.29 | 0.12 | 0.47 | 0.29 | 0.59 |
| amused5   | 0.89 | 0.22 | 0.17 | 0.06 | 0.06 | 0.02 | 0.08 | 0.22 | 0.06 | 0.08 | 0.29 | 0.34 | 0.30 | 0.63 | 0.12 | 0.44 | 0.92 | 0.17 | 0.22 | 0.13 | 0.12 | 0.29 | 0.66 | 0.42 |
| awe1      | 0.39 | 0.94 | 0.22 | 0.33 | 0.31 | 0.80 | 0.34 | 0.25 | 0.12 | 0.39 | 0.13 | 0.12 | 0.54 | 0.33 | 0.13 | 0.13 | 0.33 | 0.52 | 0.54 | 0.08 | 0.36 | 0.08 | 0.30 | 0.22 |
| awe2      | 0.36 | 0.92 | 0.22 | 0.34 | 0.44 | 0.78 | 0.54 | 0.22 | 0.02 | 0.44 | 0.18 | 0.06 | 0.60 | 0.21 | 0.17 | 0.08 | 0.08 | 0.34 | 0.74 | 0.06 | 0.18 | 0.02 | 0.34 | 0.42 |
| awe3      | 0.48 | 0.93 | 0.12 | 0.18 | 0.13 | 0.34 | 0.22 | 0.33 | 0.13 | 0.22 | 0.18 | 0.12 | 0.47 | 0.31 | 0.26 | 0.21 | 0.37 | 0.13 | 0.22 | 0.08 | 0.06 | 0.02 | 0.21 | 0.90 |
| content1  | 0.21 | 0.25 | 0.98 | 0.62 | 0.25 | 0.12 | 0.08 | 0.41 | 0.17 | 0.29 | 0.71 | 0.02 | 0.12 | 0.08 | 0.40 | 0.00 | 0.02 | 0.13 | 0.08 | 0.00 | 0.06 | 0.06 | 0.13 | 0.17 |
| content2  | 0.17 | 0.08 | 0.97 | 0.54 | 0.46 | 0.25 | 0.13 | 0.33 | 0.25 | 0.34 | 0.72 | 0.08 | 0.12 | 0.21 | 0.22 | 0.13 | 0.17 | 0.06 | 0.13 | 0.12 | 0.06 | 0.08 | 0.39 | 0.18 |
| content3  | 0.17 | 0.18 | 0.96 | 0.70 | 0.22 | 0.25 | 0.08 | 0.69 | 0.21 | 0.71 | 0.66 | 0.02 | 0.18 | 0.06 | 0.13 | 0.08 | 0.21 | 0.06 | 0.06 | 0.06 | 0.02 | 0.12 | 0.25 | 0.06 |
| grateful1 | 0.12 | 0.46 | 0.34 | 0.96 | 0.21 | 0.21 | 0.12 | 0.58 | 0.78 | 0.22 | 0.22 | 0.12 | 0.06 | 0.12 | 0.13 | 0.13 | 0.26 | 0.06 | 0.21 | 0.12 | 0.13 | 0.00 | 0.55 | 0.51 |
| grateful2 | 0.31 | 0.25 | 0.69 | 0.94 | 0.46 | 0.30 | 0.31 | 0.81 | 0.31 | 0.58 | 0.42 | 0.02 | 0.21 | 0.13 | 0.21 | 0.13 | 0.12 | 0.18 | 0.13 | 0.06 | 0.06 | 0.06 | 0.22 | 0.41 |
| grateful3 | 0.18 | 0.30 | 0.71 | 0.95 | 0.47 | 0.37 | 0.22 | 0.64 | 0.18 | 0.71 | 0.44 | 0.13 | 0.18 | 0.18 | 0.12 | 0.12 | 0.21 | 0.00 | 0.17 | 0.08 | 0.06 | 0.06 | 0.26 | 0.13 |
| grateful4 | 0.29 | 0.22 | 0.71 | 0.91 | 0.18 | 0.25 | 0.06 | 0.46 | 0.12 | 0.86 | 0.29 | 0.08 | 0.18 | 0.36 | 0.17 | 0.21 | 0.34 | 0.48 | 0.02 | 0.62 | 0.34 | 0.17 | 0.31 | 0.17 |
| hopeful1  | 0.26 | 0.36 | 0.55 | 0.55 | 0.85 | 0.91 | 0.26 | 0.60 | 0.08 | 0.64 | 0.55 | 0.13 | 0.40 | 0.08 | 0.08 | 0.08 | 0.08 | 0.13 | 0.12 | 0.06 | 0.02 | 0.00 | 0.34 | 0.26 |
| hopeful2  | 0.13 | 0.21 | 0.33 | 0.51 | 0.93 | 0.89 | 0.55 | 0.39 | 0.06 | 0.36 | 0.41 | 0.02 | 0.41 | 0.12 | 0.17 | 0.12 | 0.08 | 0.17 | 0.06 | 0.02 | 0.12 | 0.06 | 0.37 | 0.13 |
| hopeful3  | 0.30 | 0.25 | 0.61 | 0.44 | 0.96 | 0.49 | 0.18 | 0.55 | 0.08 | 0.29 | 0.52 | 0.12 | 0.65 | 0.08 | 0.13 | 0.12 | 0.08 | 0.13 | 0.21 | 0.06 | 0.12 | 0.00 | 0.21 | 0.29 |
| hopeful4  | 0.17 | 0.25 | 0.41 | 0.30 | 0.97 | 0.66 | 0.21 | 0.22 | 0.06 | 0.12 | 0.34 | 0.08 | 0.52 | 0.21 | 0.12 | 0.21 | 0.17 | 0.25 | 0.26 | 0.17 | 0.02 | 0.12 | 0.36 | 0.21 |
| inspired1 | 0.29 | 0.79 | 0.36 | 0.46 | 0.46 | 0.93 | 0.18 | 0.33 | 0.18 | 0.79 | 0.18 | 0.06 | 0.22 | 0.22 | 0.13 | 0.18 | 0.06 | 0.37 | 0.08 | 0.08 | 0.17 | 0.08 | 0.58 | 0.33 |

| Item        | amu  | awe  | con  | gra  | hop  | ins  | int  | joy  | lov  | pro  | rel  | ang  | anx  | ash  | bor  | dis  | emb  | env  | fea  | gui  | jea  | sad  | com  | sur  |
|-------------|------|------|------|------|------|------|------|------|------|------|------|------|------|------|------|------|------|------|------|------|------|------|------|------|
| inspired2   | 0.25 | 0.57 | 0.33 | 0.52 | 0.54 | 0.92 | 0.25 | 0.52 | 0.06 | 0.80 | 0.51 | 0.21 | 0.26 | 0.22 | 0.18 | 0.13 | 0.13 | 0.31 | 0.29 | 0.08 | 0.29 | 0.31 | 0.55 | 0.31 |
| interested1 | 0.62 | 0.58 | 0.51 | 0.34 | 0.40 | 0.64 | 0.96 | 0.31 | 0.17 | 0.21 | 0.18 | 0.08 | 0.37 | 0.13 | 0.22 | 0.08 | 0.12 | 0.17 | 0.17 | 0.02 | 0.06 | 0.12 | 0.31 | 0.33 |
| interested2 | 0.70 | 0.66 | 0.25 | 0.25 | 0.39 | 0.53 | 0.92 | 0.37 | 0.06 | 0.33 | 0.12 | 0.08 | 0.58 | 0.18 | 0.13 | 0.22 | 0.12 | 0.17 | 0.21 | 0.02 | 0.13 | 0.06 | 0.13 | 0.82 |
| joy1        | 0.42 | 0.22 | 0.79 | 0.77 | 0.70 | 0.46 | 0.12 | 0.89 | 0.22 | 0.63 | 0.65 | 0.06 | 0.13 | 0.12 | 0.13 | 0.13 | 0.08 | 0.08 | 0.13 | 0.00 | 0.12 | 0.13 | 0.29 | 0.26 |
| joy2        | 0.44 | 0.29 | 0.57 | 0.77 | 0.41 | 0.33 | 0.12 | 0.95 | 0.21 | 0.48 | 0.60 | 0.02 | 0.22 | 0.17 | 0.08 | 0.08 | 0.08 | 0.06 | 0.08 | 0.02 | 0.02 | 0.00 | 0.33 | 0.57 |
| joy3        | 0.78 | 0.22 | 0.68 | 0.56 | 0.30 | 0.47 | 0.66 | 0.93 | 0.29 | 0.17 | 0.53 | 0.02 | 0.33 | 0.13 | 0.22 | 0.17 | 0.08 | 0.18 | 0.13 | 0.06 | 0.17 | 0.08 | 0.30 | 0.18 |
| joy4        | 0.82 | 0.22 | 0.61 | 0.29 | 0.25 | 0.18 | 0.50 | 0.96 | 0.06 | 0.34 | 0.18 | 0.02 | 0.12 | 0.12 | 0.08 | 0.17 | 0.12 | 0.12 | 0.06 | 0.13 | 0.13 | 0.00 | 0.29 | 0.22 |
| loved1      | 0.18 | 0.30 | 0.75 | 0.80 | 0.25 | 0.31 | 0.17 | 0.56 | 0.93 | 0.37 | 0.66 | 0.02 | 0.12 | 0.08 | 0.18 | 0.17 | 0.08 | 0.12 | 0.02 | 0.06 | 0.00 | 0.06 | 0.53 | 0.17 |
| loved2      | 0.25 | 0.52 | 0.33 | 0.78 | 0.17 | 0.60 | 0.69 | 0.66 | 0.89 | 0.54 | 0.12 | 0.17 | 0.29 | 0.17 | 0.21 | 0.06 | 0.29 | 0.18 | 0.12 | 0.06 | 0.06 | 0.08 | 0.72 | 0.30 |
| loved3      | 0.17 | 0.33 | 0.48 | 0.92 | 0.30 | 0.18 | 0.00 | 0.30 | 0.93 | 0.22 | 0.48 | 0.02 | 0.02 | 0.29 | 0.13 | 0.18 | 0.13 | 0.08 | 0.08 | 0.06 | 0.02 | 0.08 | 0.51 | 0.08 |
| loved4      | 0.39 | 0.54 | 0.60 | 0.77 | 0.12 | 0.50 | 0.57 | 0.49 | 0.91 | 0.49 | 0.30 | 0.06 | 0.25 | 0.29 | 0.21 | 0.13 | 0.42 | 0.31 | 0.06 | 0.06 | 0.26 | 0.08 | 0.44 | 0.40 |
| loved5      | 0.29 | 0.41 | 0.40 | 0.86 | 0.66 | 0.58 | 0.33 | 0.31 | 0.91 | 0.46 | 0.21 | 0.13 | 0.22 | 0.18 | 0.08 | 0.13 | 0.18 | 0.08 | 0.21 | 0.12 | 0.17 | 0.08 | 0.58 | 0.22 |
| proud1      | 0.12 | 0.18 | 0.64 | 0.65 | 0.47 | 0.60 | 0.06 | 0.37 | 0.02 | 0.97 | 0.40 | 0.17 | 0.08 | 0.17 | 0.22 | 0.13 | 0.06 | 0.06 | 0.06 | 0.12 | 0.00 | 0.08 | 0.36 | 0.08 |
| proud2      | 0.25 | 0.22 | 0.66 | 0.62 | 0.21 | 0.58 | 0.18 | 0.74 | 0.06 | 0.95 | 0.62 | 0.08 | 0.22 | 0.08 | 0.12 | 0.25 | 0.02 | 0.17 | 0.06 | 0.02 | 0.02 | 0.00 | 0.21 | 0.25 |
| proud3      | 0.54 | 0.36 | 0.55 | 0.22 | 0.06 | 0.36 | 0.06 | 0.31 | 0.22 | 0.95 | 0.29 | 0.30 | 0.22 | 0.46 | 0.17 | 0.34 | 0.25 | 0.70 | 0.00 | 0.41 | 0.60 | 0.08 | 0.30 | 0.12 |
| proud4      | 0.33 | 0.46 | 0.68 | 0.53 | 0.40 | 0.62 | 0.40 | 0.54 | 0.62 | 0.93 | 0.25 | 0.08 | 0.33 | 0.30 | 0.17 | 0.02 | 0.25 | 0.44 | 0.17 | 0.06 | 0.12 | 0.06 | 0.44 | 0.26 |
| relieved1   | 0.22 | 0.31 | 0.31 | 0.72 | 0.25 | 0.13 | 0.00 | 0.39 | 0.08 | 0.00 | 0.96 | 0.37 | 0.42 | 0.18 | 0.26 | 0.36 | 0.22 | 0.02 | 0.25 | 0.21 | 0.08 | 0.49 | 0.21 | 0.39 |
| relieved2   | 0.26 | 0.13 | 0.41 | 0.71 | 0.33 | 0.12 | 0.13 | 0.53 | 0.06 | 0.26 | 0.97 | 0.40 | 0.30 | 0.21 | 0.18 | 0.26 | 0.21 | 0.13 | 0.13 | 0.13 | 0.13 | 0.48 | 0.13 | 0.08 |
| relieved3   | 0.31 | 0.31 | 0.51 | 0.73 | 0.31 | 0.06 | 0.18 | 0.30 | 0.08 | 0.18 | 0.96 | 0.13 | 0.30 | 0.18 | 0.25 | 0.26 | 0.13 | 0.13 | 0.06 | 0.02 | 0.08 | 0.17 | 0.21 | 0.72 |
| angry1      | 0.08 | 0.18 | 0.31 | 0.25 | 0.29 | 0.26 | 0.18 | 0.13 | 0.13 | 0.21 | 0.13 | 0.96 | 0.73 | 0.22 | 0.18 | 0.57 | 0.08 | 0.49 | 0.37 | 0.12 | 0.30 | 0.58 | 0.17 | 0.21 |
| angry2      | 0.12 | 0.17 | 0.08 | 0.02 | 0.06 | 0.12 | 0.06 | 0.06 | 0.02 | 0.12 | 0.18 | 0.96 | 0.37 | 0.37 | 0.17 | 0.71 | 0.13 | 0.42 | 0.22 | 0.21 | 0.44 | 0.73 | 0.22 | 0.18 |
| angry3      | 0.12 | 0.13 | 0.12 | 0.13 | 0.06 | 0.02 | 0.00 | 0.12 | 0.06 | 0.06 | 0.21 | 0.94 | 0.31 | 0.29 | 0.12 | 0.51 | 0.18 | 0.17 | 0.86 | 0.18 | 0.12 | 0.80 | 0.08 | 0.18 |
| angry4      | 0.17 | 0.25 | 0.21 | 0.12 | 0.02 | 0.08 | 0.00 | 0.06 | 0.13 | 0.13 | 0.08 | 0.97 | 0.26 | 0.40 | 0.17 | 0.70 | 0.50 | 0.12 | 0.18 | 0.12 | 0.06 | 0.62 | 0.21 | 0.31 |

| Item         | amu  | awe  | con  | gra  | hop  | ins  | int  | joy  | lov  | pro  | rel  | ang  | anx  | ash  | bor  | dis  | emb  | env  | fea  | gui  | jea  | sad  | com  | sur  |
|--------------|------|------|------|------|------|------|------|------|------|------|------|------|------|------|------|------|------|------|------|------|------|------|------|------|
| anxious1     | 0.12 | 0.37 | 0.34 | 0.13 | 0.47 | 0.06 | 0.25 | 0.06 | 0.02 | 0.06 | 0.08 | 0.22 | 0.97 | 0.22 | 0.31 | 0.30 | 0.08 | 0.18 | 0.74 | 0.12 | 0.08 | 0.30 | 0.08 | 0.37 |
| anxious2     | 0.13 | 0.17 | 0.08 | 0.02 | 0.13 | 0.06 | 0.02 | 0.00 | 0.08 | 0.06 | 0.06 | 0.46 | 0.96 | 0.36 | 0.21 | 0.30 | 0.22 | 0.06 | 0.87 | 0.30 | 0.06 | 0.61 | 0.21 | 0.18 |
| anxious3     | 0.08 | 0.21 | 0.17 | 0.12 | 0.12 | 0.02 | 0.25 | 0.06 | 0.08 | 0.06 | 0.13 | 0.31 | 0.96 | 0.33 | 0.13 | 0.37 | 0.36 | 0.21 | 0.87 | 0.29 | 0.08 | 0.29 | 0.26 | 0.12 |
| ashamed1     | 0.18 | 0.21 | 0.29 | 0.02 | 0.08 | 0.13 | 0.12 | 0.12 | 0.13 | 0.25 | 0.17 | 0.57 | 0.57 | 0.94 | 0.13 | 0.69 | 0.68 | 0.22 | 0.22 | 0.69 | 0.12 | 0.44 | 0.22 | 0.25 |
| ashamed2     | 0.18 | 0.26 | 0.29 | 0.12 | 0.13 | 0.29 | 0.06 | 0.00 | 0.12 | 0.21 | 0.08 | 0.33 | 0.39 | 0.95 | 0.25 | 0.66 | 0.75 | 0.17 | 0.17 | 0.57 | 0.06 | 0.70 | 0.18 | 0.17 |
| ashamed3     | 0.17 | 0.25 | 0.34 | 0.12 | 0.17 | 0.06 | 0.06 | 0.08 | 0.13 | 0.17 | 0.21 | 0.34 | 0.26 | 0.96 | 0.17 | 0.57 | 0.67 | 0.17 | 0.17 | 0.63 | 0.13 | 0.63 | 0.22 | 0.08 |
| bored1       | 0.12 | 0.22 | 0.61 | 0.21 | 0.25 | 0.12 | 0.06 | 0.02 | 0.08 | 0.00 | 0.34 | 0.46 | 0.71 | 0.31 | 0.95 | 0.48 | 0.29 | 0.18 | 0.31 | 0.13 | 0.08 | 0.66 | 0.25 | 0.17 |
| bored2       | 0.33 | 0.34 | 0.69 | 0.21 | 0.21 | 0.18 | 0.40 | 0.08 | 0.06 | 0.12 | 0.44 | 0.18 | 0.46 | 0.26 | 0.97 | 0.21 | 0.13 | 0.17 | 0.17 | 0.13 | 0.08 | 0.39 | 0.58 | 0.36 |
| bored3       | 0.37 | 0.33 | 0.48 | 0.08 | 0.06 | 0.12 | 0.22 | 0.06 | 0.02 | 0.00 | 0.34 | 0.34 | 0.48 | 0.29 | 0.97 | 0.37 | 0.26 | 0.25 | 0.17 | 0.25 | 0.17 | 0.33 | 0.22 | 0.49 |
| bored4       | 0.40 | 0.18 | 0.53 | 0.34 | 0.12 | 0.31 | 0.34 | 0.39 | 0.06 | 0.44 | 0.70 | 0.08 | 0.33 | 0.22 | 0.96 | 0.06 | 0.22 | 0.29 | 0.06 | 0.17 | 0.13 | 0.06 | 0.18 | 0.54 |
| disgusted1   | 0.12 | 0.13 | 0.08 | 0.12 | 0.02 | 0.08 | 0.08 | 0.06 | 0.06 | 0.12 | 0.08 | 0.74 | 0.72 | 0.39 | 0.26 | 0.92 | 0.17 | 0.13 | 0.88 | 0.18 | 0.08 | 0.46 | 0.06 | 0.17 |
| disgusted2   | 0.22 | 0.22 | 0.13 | 0.06 | 0.18 | 0.08 | 0.02 | 0.08 | 0.00 | 0.12 | 0.13 | 0.25 | 0.17 | 0.36 | 0.17 | 0.99 | 0.29 | 0.17 | 0.25 | 0.17 | 0.02 | 0.22 | 0.13 | 0.30 |
| disgusted3   | 0.25 | 0.21 | 0.17 | 0.13 | 0.08 | 0.06 | 0.02 | 0.06 | 0.02 | 0.18 | 0.17 | 0.87 | 0.30 | 0.77 | 0.21 | 0.92 | 0.46 | 0.18 | 0.36 | 0.25 | 0.08 | 0.47 | 0.18 | 0.44 |
| disgusted4   | 0.25 | 0.30 | 0.21 | 0.12 | 0.02 | 0.08 | 0.13 | 0.02 | 0.12 | 0.13 | 0.12 | 0.83 | 0.31 | 0.75 | 0.08 | 0.91 | 0.83 | 0.08 | 0.13 | 0.18 | 0.06 | 0.39 | 0.17 | 0.36 |
| disgusted5   | 0.26 | 0.33 | 0.40 | 0.08 | 0.13 | 0.00 | 0.08 | 0.08 | 0.13 | 0.12 | 0.17 | 0.86 | 0.51 | 0.21 | 0.40 | 0.94 | 0.37 | 0.44 | 0.18 | 0.25 | 0.36 | 0.54 | 0.37 | 0.21 |
| embarrassed1 | 0.22 | 0.21 | 0.21 | 0.08 | 0.13 | 0.08 | 0.06 | 0.13 | 0.02 | 0.12 | 0.13 | 0.06 | 0.42 | 0.82 | 0.13 | 0.22 | 0.98 | 0.08 | 0.18 | 0.02 | 0.00 | 0.12 | 0.26 | 0.13 |
| embarrassed2 | 0.12 | 0.17 | 0.17 | 0.17 | 0.13 | 0.13 | 0.00 | 0.06 | 0.08 | 0.13 | 0.17 | 0.67 | 0.53 | 0.85 | 0.25 | 0.30 | 0.95 | 0.13 | 0.29 | 0.13 | 0.12 | 0.22 | 0.17 | 0.29 |
| embarrassed3 | 0.34 | 0.51 | 0.29 | 0.60 | 0.12 | 0.42 | 0.08 | 0.41 | 0.42 | 0.61 | 0.13 | 0.36 | 0.41 | 0.51 | 0.18 | 0.44 | 0.93 | 0.25 | 0.08 | 0.26 | 0.13 | 0.29 | 0.25 | 0.65 |
| envy1        | 0.13 | 0.18 | 0.29 | 0.08 | 0.42 | 0.30 | 0.36 | 0.02 | 0.12 | 0.18 | 0.22 | 0.52 | 0.44 | 0.17 | 0.22 | 0.22 | 0.18 | 0.93 | 0.13 | 0.13 | 0.90 | 0.13 | 0.21 | 0.17 |
| envy2        | 0.25 | 0.40 | 0.25 | 0.33 | 0.25 | 0.44 | 0.49 | 0.25 | 0.13 | 0.22 | 0.06 | 0.12 | 0.22 | 0.13 | 0.02 | 0.17 | 0.17 | 0.94 | 0.06 | 0.06 | 0.90 | 0.02 | 0.31 | 0.22 |
| envy3        | 0.21 | 0.25 | 0.26 | 0.08 | 0.76 | 0.36 | 0.31 | 0.06 | 0.08 | 0.12 | 0.17 | 0.12 | 0.47 | 0.22 | 0.18 | 0.18 | 0.12 | 0.94 | 0.08 | 0.29 | 0.83 | 0.54 | 0.22 | 0.06 |
| fear1        | 0.12 | 0.13 | 0.21 | 0.08 | 0.08 | 0.12 | 0.06 | 0.06 | 0.00 | 0.13 | 0.00 | 0.68 | 0.81 | 0.26 | 0.22 | 0.22 | 0.13 | 0.21 | 0.97 | 0.02 | 0.22 | 0.26 | 0.17 | 0.25 |
| fear2        | 0.13 | 0.12 | 0.18 | 0.12 | 0.08 | 0.08 | 0.02 | 0.12 | 0.02 | 0.21 | 0.21 | 0.54 | 0.78 | 0.18 | 0.13 | 0.18 | 0.17 | 0.13 | 0.97 | 0.08 | 0.02 | 0.41 | 0.26 | 0.31 |

| Item           | amu  | awe  | con  | gra  | hop  | ins  | int  | joy  | lov  | pro  | rel  | ang  | anx  | ash  | bor  | dis  | emb  | env  | fea  | gui  | jea  | sad  | com  | sur  |
|----------------|------|------|------|------|------|------|------|------|------|------|------|------|------|------|------|------|------|------|------|------|------|------|------|------|
| guilty1        | 0.12 | 0.21 | 0.21 | 0.06 | 0.08 | 0.06 | 0.12 | 0.12 | 0.12 | 0.13 | 0.17 | 0.49 | 0.29 | 0.91 | 0.08 | 0.30 | 0.54 | 0.06 | 0.26 | 0.92 | 0.06 | 0.67 | 0.30 | 0.17 |
| guilty2        | 0.06 | 0.13 | 0.25 | 0.06 | 0.02 | 0.00 | 0.06 | 0.06 | 0.06 | 0.08 | 0.02 | 0.55 | 0.36 | 0.94 | 0.18 | 0.51 | 0.88 | 0.06 | 0.17 | 0.73 | 0.13 | 0.26 | 0.17 | 0.33 |
| jealous1       | 0.18 | 0.29 | 0.17 | 0.17 | 0.12 | 0.18 | 0.08 | 0.12 | 0.17 | 0.12 | 0.12 | 0.47 | 0.29 | 0.18 | 0.12 | 0.26 | 0.25 | 0.81 | 0.26 | 0.08 | 0.96 | 0.69 | 0.31 | 0.18 |
| jealous2       | 0.06 | 0.18 | 0.29 | 0.13 | 0.08 | 0.13 | 0.02 | 0.17 | 0.18 | 0.08 | 0.08 | 0.51 | 0.18 | 0.18 | 0.44 | 0.17 | 0.25 | 0.79 | 0.21 | 0.06 | 0.97 | 0.49 | 0.25 | 0.26 |
| jealous3       | 0.25 | 0.18 | 0.13 | 0.29 | 0.17 | 0.12 | 0.36 | 0.17 | 0.49 | 0.17 | 0.17 | 0.33 | 0.30 | 0.33 | 0.18 | 0.21 | 0.22 | 0.83 | 0.12 | 0.02 | 0.96 | 0.30 | 0.41 | 0.17 |
| sad1           | 0.13 | 0.25 | 0.18 | 0.00 | 0.02 | 0.12 | 0.12 | 0.06 | 0.13 | 0.06 | 0.12 | 0.87 | 0.48 | 0.57 | 0.18 | 0.58 | 0.40 | 0.18 | 0.08 | 0.29 | 0.18 | 0.94 | 0.12 | 0.48 |
| sad2           | 0.13 | 0.12 | 0.13 | 0.13 | 0.08 | 0.06 | 0.06 | 0.06 | 0.08 | 0.08 | 0.17 | 0.65 | 0.33 | 0.17 | 0.25 | 0.31 | 0.13 | 0.12 | 0.33 | 0.22 | 0.13 | 0.98 | 0.22 | 0.21 |
| compassionate1 | 0.17 | 0.25 | 0.12 | 0.00 | 0.06 | 0.13 | 0.08 | 0.00 | 0.02 | 0.12 | 0.18 | 0.25 | 0.30 | 0.17 | 0.18 | 0.25 | 0.08 | 0.13 | 0.46 | 0.46 | 0.02 | 0.90 | 0.95 | 0.02 |
| compassionate2 | 0.21 | 0.17 | 0.18 | 0.47 | 0.44 | 0.48 | 0.52 | 0.06 | 0.26 | 0.39 | 0.26 | 0.21 | 0.41 | 0.25 | 0.22 | 0.18 | 0.30 | 0.13 | 0.08 | 0.17 | 0.02 | 0.34 | 0.97 | 0.08 |
| compassionate3 | 0.06 | 0.25 | 0.22 | 0.40 | 0.62 | 0.40 | 0.62 | 0.62 | 0.18 | 0.40 | 0.62 | 0.82 | 0.37 | 0.42 | 0.25 | 0.56 | 0.29 | 0.21 | 0.18 | 0.49 | 0.62 | 0.86 | 0.91 | 0.18 |
| surprised1     | 0.18 | 0.42 | 0.08 | 0.21 | 0.21 | 0.17 | 0.21 | 0.12 | 0.08 | 0.12 | 0.21 | 0.69 | 0.73 | 0.25 | 0.17 | 0.25 | 0.13 | 0.12 | 0.33 | 0.12 | 0.00 | 0.21 | 0.17 | 0.98 |
| surprised2     | 0.29 | 0.39 | 0.17 | 0.22 | 0.25 | 0.17 | 0.13 | 0.12 | 0.13 | 0.12 | 0.17 | 0.13 | 0.62 | 0.17 | 0.22 | 0.21 | 0.17 | 0.06 | 0.51 | 0.06 | 0.00 | 0.02 | 0.17 | 0.98 |

*Note:* Greyed cells indicate chance-adjusted hit rates for the item-level target responses.

**Table S6**

*Study 1: Emotion-Level Chance-Adjusted Hit Rate (Item Difficulty) on the CORE Test (Confusion Matrix)*

| Emotion     | amu  | awe  | con  | gra  | hop  | ins  | int  | joy  | lov  | pro  | rel  | ang  | anx  | ash  | bor  | dis  | emb  | env  | fea  | gui  | jea  | sad  | com  | sur  |
|-------------|------|------|------|------|------|------|------|------|------|------|------|------|------|------|------|------|------|------|------|------|------|------|------|------|
| amused      | 0.89 | 0.29 | 0.35 | 0.12 | 0.12 | 0.13 | 0.33 | 0.61 | 0.08 | 0.10 | 0.33 | 0.62 | 0.42 | 0.55 | 0.24 | 0.73 | 0.75 | 0.18 | 0.25 | 0.18 | 0.11 | 0.35 | 0.41 | 0.57 |
| awed        | 0.42 | 0.93 | 0.19 | 0.29 | 0.31 | 0.72 | 0.39 | 0.27 | 0.09 | 0.36 | 0.17 | 0.10 | 0.54 | 0.29 | 0.19 | 0.15 | 0.28 | 0.37 | 0.58 | 0.07 | 0.22 | 0.04 | 0.29 | 0.74 |
| content     | 0.18 | 0.18 | 0.97 | 0.63 | 0.33 | 0.21 | 0.10 | 0.53 | 0.21 | 0.52 | 0.70 | 0.04 | 0.14 | 0.12 | 0.27 | 0.07 | 0.14 | 0.09 | 0.09 | 0.06 | 0.05 | 0.09 | 0.27 | 0.14 |
| grateful    | 0.23 | 0.32 | 0.65 | 0.94 | 0.36 | 0.29 | 0.19 | 0.67 | 0.50 | 0.70 | 0.35 | 0.09 | 0.16 | 0.21 | 0.16 | 0.15 | 0.24 | 0.23 | 0.14 | 0.32 | 0.17 | 0.08 | 0.37 | 0.34 |
| hopeful     | 0.22 | 0.27 | 0.50 | 0.46 | 0.94 | 0.83 | 0.34 | 0.47 | 0.07 | 0.42 | 0.47 | 0.09 | 0.51 | 0.13 | 0.13 | 0.13 | 0.10 | 0.17 | 0.17 | 0.08 | 0.07 | 0.05 | 0.33 | 0.23 |
| inspired    | 0.27 | 0.71 | 0.35 | 0.49 | 0.50 | 0.92 | 0.22 | 0.44 | 0.13 | 0.79 | 0.38 | 0.14 | 0.24 | 0.22 | 0.16 | 0.16 | 0.10 | 0.34 | 0.20 | 0.08 | 0.23 | 0.21 | 0.56 | 0.32 |
| interested  | 0.66 | 0.62 | 0.40 | 0.30 | 0.39 | 0.59 | 0.94 | 0.34 | 0.12 | 0.28 | 0.15 | 0.08 | 0.50 | 0.16 | 0.18 | 0.16 | 0.12 | 0.17 | 0.19 | 0.02 | 0.10 | 0.09 | 0.23 | 0.70 |
| joyful      | 0.70 | 0.24 | 0.69 | 0.67 | 0.48 | 0.38 | 0.44 | 0.94 | 0.20 | 0.45 | 0.54 | 0.03 | 0.21 | 0.13 | 0.13 | 0.14 | 0.09 | 0.11 | 0.10 | 0.06 | 0.11 | 0.06 | 0.30 | 0.35 |
| loved       | 0.26 | 0.43 | 0.56 | 0.84 | 0.37 | 0.48 | 0.45 | 0.50 | 0.92 | 0.43 | 0.42 | 0.08 | 0.19 | 0.21 | 0.17 | 0.14 | 0.24 | 0.16 | 0.10 | 0.07 | 0.11 | 0.08 | 0.58 | 0.25 |
| proud       | 0.35 | 0.33 | 0.64 | 0.55 | 0.32 | 0.56 | 0.20 | 0.55 | 0.33 | 0.95 | 0.43 | 0.17 | 0.22 | 0.28 | 0.17 | 0.20 | 0.16 | 0.44 | 0.08 | 0.19 | 0.28 | 0.06 | 0.34 | 0.19 |
| relieved    | 0.27 | 0.26 | 0.42 | 0.72 | 0.30 | 0.11 | 0.11 | 0.42 | 0.07 | 0.16 | 0.96 | 0.32 | 0.34 | 0.19 | 0.23 | 0.30 | 0.19 | 0.10 | 0.16 | 0.13 | 0.10 | 0.41 | 0.19 | 0.51 |
| angry       | 0.12 | 0.19 | 0.19 | 0.14 | 0.12 | 0.13 | 0.07 | 0.10 | 0.09 | 0.13 | 0.15 | 0.96 | 0.50 | 0.33 | 0.16 | 0.64 | 0.27 | 0.33 | 0.61 | 0.16 | 0.26 | 0.70 | 0.17 | 0.22 |
| anxious     | 0.11 | 0.26 | 0.21 | 0.09 | 0.28 | 0.05 | 0.19 | 0.04 | 0.06 | 0.06 | 0.09 | 0.34 | 0.96 | 0.31 | 0.22 | 0.32 | 0.24 | 0.16 | 0.84 | 0.24 | 0.07 | 0.44 | 0.19 | 0.24 |
| ashamed     | 0.18 | 0.24 | 0.31 | 0.09 | 0.13 | 0.17 | 0.08 | 0.07 | 0.13 | 0.21 | 0.16 | 0.43 | 0.43 | 0.95 | 0.19 | 0.65 | 0.70 | 0.19 | 0.19 | 0.64 | 0.11 | 0.61 | 0.21 | 0.17 |
| bored       | 0.32 | 0.28 | 0.59 | 0.22 | 0.17 | 0.19 | 0.28 | 0.17 | 0.06 | 0.19 | 0.50 | 0.30 | 0.54 | 0.27 | 0.96 | 0.32 | 0.23 | 0.22 | 0.19 | 0.17 | 0.12 | 0.43 | 0.36 | 0.42 |
| disgusted   | 0.22 | 0.25 | 0.21 | 0.10 | 0.09 | 0.06 | 0.07 | 0.06 | 0.07 | 0.13 | 0.13 | 0.80 | 0.48 | 0.60 | 0.24 | 0.95 | 0.56 | 0.22 | 0.60 | 0.21 | 0.14 | 0.43 | 0.20 | 0.31 |
| embarrassed | 0.24 | 0.33 | 0.22 | 0.37 | 0.13 | 0.24 | 0.05 | 0.23 | 0.22 | 0.37 | 0.15 | 0.46 | 0.46 | 0.78 | 0.19 | 0.33 | 0.96 | 0.16 | 0.19 | 0.15 | 0.09 | 0.22 | 0.23 | 0.44 |
| envious     | 0.20 | 0.29 | 0.27 | 0.18 | 0.57 | 0.37 | 0.40 | 0.12 | 0.11 | 0.18 | 0.16 | 0.31 | 0.39 | 0.18 | 0.15 | 0.19 | 0.16 | 0.94 | 0.09 | 0.17 | 0.88 | 0.30 | 0.25 | 0.16 |
| fearful     | 0.13 | 0.13 | 0.20 | 0.10 | 0.08 | 0.10 | 0.04 | 0.09 | 0.01 | 0.17 | 0.12 | 0.62 | 0.79 | 0.22 | 0.18 | 0.20 | 0.15 | 0.17 | 0.97 | 0.05 | 0.13 | 0.35 | 0.22 | 0.28 |
| guilty      | 0.09 | 0.17 | 0.23 | 0.06 | 0.05 | 0.03 | 0.09 | 0.09 | 0.09 | 0.11 | 0.10 | 0.52 | 0.33 | 0.92 | 0.13 | 0.42 | 0.80 | 0.06 | 0.22 | 0.86 | 0.10 | 0.53 | 0.24 | 0.26 |

| Emotion       | amu  | awe  | con  | gra  | hop  | ins  | int  | joy  | lov  | pro  | rel  | ang  | anx  | ash  | bor  | dis  | emb  | env  | fea  | gui  | jea  | sad  | com  | sur  |
|---------------|------|------|------|------|------|------|------|------|------|------|------|------|------|------|------|------|------|------|------|------|------|------|------|------|
| jealous       | 0.17 | 0.22 | 0.20 | 0.20 | 0.12 | 0.15 | 0.18 | 0.15 | 0.31 | 0.12 | 0.12 | 0.45 | 0.26 | 0.24 | 0.27 | 0.22 | 0.24 | 0.81 | 0.20 | 0.06 | 0.96 | 0.54 | 0.33 | 0.21 |
| sad           | 0.13 | 0.19 | 0.16 | 0.07 | 0.05 | 0.09 | 0.09 | 0.06 | 0.11 | 0.07 | 0.14 | 0.80 | 0.42 | 0.42 | 0.22 | 0.47 | 0.29 | 0.15 | 0.22 | 0.26 | 0.16 | 0.97 | 0.17 | 0.37 |
| compassionate | 0.15 | 0.22 | 0.18 | 0.34 | 0.45 | 0.37 | 0.48 | 0.35 | 0.17 | 0.32 | 0.42 | 0.61 | 0.36 | 0.30 | 0.22 | 0.37 | 0.23 | 0.16 | 0.28 | 0.40 | 0.35 | 0.83 | 0.95 | 0.10 |
| surprised     | 0.24 | 0.40 | 0.13 | 0.22 | 0.23 | 0.17 | 0.17 | 0.12 | 0.11 | 0.12 | 0.19 | 0.53 | 0.68 | 0.21 | 0.20 | 0.23 | 0.15 | 0.09 | 0.43 | 0.09 | 0.00 | 0.13 | 0.17 | 0.98 |

*Note:* Greyed cells indicate chance-adjusted hit rates for the emotion-level target responses.

**Table S7***Full Item Set and Scoring Key for the Core Relational Themes of Emotion (CORE) Test*

| Item Name      | CORE Item                                                                                        | Full Credit<br>(1) | Half Credit<br>(.50) | No Credit 1<br>(0) | No Credit 2<br>(0) | No Credit 3<br>(0) |
|----------------|--------------------------------------------------------------------------------------------------|--------------------|----------------------|--------------------|--------------------|--------------------|
| Amused1        | People often feel _____ when they find something humorous.                                       | amused             | joyful               | grateful           | hopeful            | inspired           |
| Amused2        | People often feel _____ when something is absurd but nonthreatening.                             | amused             | surprised            | content            | loved              | proud              |
| Awed1          | People often feel _____ when they are in the presence of something much greater than themselves. | awed               | inspired             | amused             | compassionate      | relieved           |
| Awed2          | People often feel _____ when what's in front of them is something powerful.                      | awed               | fearful              | ashamed            | bored              | disgusted          |
| Compassionate1 | People often feel _____ when someone else is in pain.                                            | compassionate      | sad                  | embarrassed        | envious            | surprised          |
| Compassionate2 | People often feel _____ when someone else needs help or support.                                 | compassionate      | anxious              | bored              | guilty             | jealous            |
| Content2       | People often feel _____ when they fully accept things as they are.                               | content            | relieved             | amused             | interested         | surprised          |
| Content3       | People often feel _____ when things in their life seem complete.                                 | content            | grateful             | hopeful            | inspired           | loved              |
| Grateful1      | People often feel _____ when someone is generous toward them.                                    | grateful           | loved                | hopeful            | interested         | proud              |
| Grateful3      | People often feel _____ when they see themselves as fortunate.                                   | grateful           | content              | amused             | compassionate      | surprised          |
| Hopeful3       | People often feel _____ when they think something might go well.                                 | hopeful            | grateful             | awed               | interested         | proud              |
| Hopeful4       | People often feel _____ when they think an unfavorable situation can be improved in the future.  | hopeful            | relieved             | amused             | compassionate      | surprised          |
| Inspired1      | People often feel _____ when another person shows extraordinary moral courage.                   | inspired           | awed                 | interested         | loved              | relieved           |
| Inspired2      | People often feel _____ when someone else is able to overcome extreme hardship.                  | inspired           | awed                 | amused             | interested         | content            |



|              |                                                                                                 |             |           |             |               |           |
|--------------|-------------------------------------------------------------------------------------------------|-------------|-----------|-------------|---------------|-----------|
| Joyful2      | People often feel _____ when they are the recipient of good news.                               | joyful      | grateful  | amused      | compassionate | hopeful   |
| Joyful3      | People often feel _____ when they are free to engage in play.                                   | joyful      | amused    | awed        | proud         | surprised |
| Loved1       | People often feel _____ when someone else fully accepts them for who they are.                  | loved       | grateful  | hopeful     | interested    | surprised |
| Loved3       | People often feel _____ when another person is always there for them.                           | loved       | grateful  | amused      | hopeful       | inspired  |
| Proud2       | People often feel _____ when a goal of theirs has been achieved.                                | proud       | joyful    | awed        | compassionate | surprised |
| Proud3       | People often feel _____ when they think that they're better than others.                        | proud       | content   | interested  | hopeful       | loved     |
| Angry1       | People often feel _____ when something gets in the way of what they want.                       | angry       | anxious   | guilty      | jealous       | surprised |
| Angry2       | People often feel _____ when they believe something is unfair.                                  | angry       | disgusted | bored       | embarrassed   | envious   |
| Anxious1     | People often feel _____ when something important is uncertain.                                  | anxious     | fearful   | ashamed     | envious       | sad       |
| Anxious3     | People often feel _____ when they sense something could be wrong.                               | anxious     | fearful   | bored       | guilty        | jealous   |
| Ashamed1     | People often feel _____ when they behave in a way that conflicts with their own code of ethics. | ashamed     | guilty    | fearful     | jealous       | surprised |
| Ashamed3     | People often feel _____ when they don't see themselves as an honorable person.                  | ashamed     | sad       | anxious     | bored         | envious   |
| Bored1       | People often feel _____ when what they're experiencing hasn't changed for a while.              | bored       | angry     | embarrassed | guilty        | surprised |
| Bored3       | People often feel _____ when what's in front of them doesn't seem relevant to them at all.      | bored       | angry     | fearful     | jealous       | sad       |
| Disgusted2   | People often feel _____ when what they encounter is gross.                                      | disgusted   | surprised | bored       | envious       | sad       |
| Disgusted5   | People often feel _____ when someone else doesn't deserve any respect at all.                   | disgusted   | angry     | fearful     | guilty        | surprised |
| Embarrassed1 | People often feel _____ when they do something in public that is awkward.                       | embarrassed | ashamed   | angry       | bored         | jealous   |

|              |                                                                                               |             |         |             |             |           |
|--------------|-----------------------------------------------------------------------------------------------|-------------|---------|-------------|-------------|-----------|
| Embarrassed3 | People often feel _____ when they receive unwanted praise from others.                        | embarrassed | ashamed | envious     | fearful     | sad       |
| Envy1        | People often feel _____ when they think something should be theirs.                           | envious     | jealous | ashamed     | fearful     | surprised |
| Envy2        | People often feel _____ when someone else has something valuable.                             | envious     | jealous | angry       | bored       | guilty    |
| Jealous1     | People often feel _____ when someone they care about might like someone else more than them.  | jealous     | envious | bored       | fearful     | surprised |
| Jealous3     | People often feel _____ when someone close to them pays a lot of attention to another person. | jealous     | envious | anxious     | embarrassed | guilty    |
| Sad1         | People often feel _____ when something did not turn out the way they wanted.                  | sad         | angry   | bored       | fearful     | jealous   |
| Sad2         | People often feel _____ when something that matters to them is gone.                          | sad         | angry   | embarrassed | envious     | guilty    |

---

*Note:* The item numbers were retained from the original item set (see Table S3).

## Figure S1

### *The Core Relational Themes of Emotion (CORE) Test Instructions*

#### **Task Instructions:**

**In this task, you will be provided with a series of sentences to fill in. Please select the one emotion you think best completes each sentence.**

There will be **more sentences** than there are emotions, so you can select the **same emotion multiple times** throughout the task.

Once you have decided on the emotion that best completes the sentence, such as '**distressed**' in the example below, mark that option and move to the next sentence.

#### **Here's an Example Item with Answer:**

Please select the one emotion that **best completes the sentence below**.

People often feel \_\_\_\_\_ when their situation presents a series of **challenges they cannot handle**.

- ☐ guilty
- ☐ sad
- ☐ jealous
- ☐ surprised
- ☒ **distressed**

**Table S8***Study 2: Participant Demographic Characteristics*

| Demographic Characteristic     | % or Mean ( <i>SD</i> ) |
|--------------------------------|-------------------------|
| <b>Age</b>                     | 41.2 ( <i>14.2</i> )    |
| <b>Gender</b>                  |                         |
| Female                         | 50.4                    |
| Male                           | 49.6                    |
| Non-Binary Identity            | 0.0                     |
| <b>Race/Ethnicity</b>          |                         |
| White/European American        | 66.2                    |
| Latinx/Hispanic                | 14.8                    |
| Black/African American         | 12.3                    |
| Asian/Asian American           | 6.7                     |
| <b>Primary Language Spoken</b> |                         |
| English                        | 100                     |
| <b>Education Level</b>         |                         |
| High School                    | 27.1                    |
| Some College                   | 10.2                    |
| Associate Degree               | 16.5                    |
| Bachelor's Degree              | 26.4                    |
| Master's Degree                | 15.5                    |
| Doctoral Degree                | 4.2                     |
| <b>Job Status</b>              |                         |
| Full-time (>30 hours a week)   | 100.0                   |
| <b>Job Type</b>                |                         |
| Other                          | 39.1                    |
| Business or Finance            | 10.9                    |
| Construction or Manufacturing  | 10.6                    |
| Service Sector                 | 8.5                     |
| Tech Industry                  | 8.5                     |
| Managerial                     | 8.1                     |
| Education or Research          | 7.0                     |
| Law or Medicine                | 4.2                     |
| Not Currently Employed         | 3.2                     |

*Note.* *N* = 284.

**Table S9***Study 2: Factor Loadings from a One-Factor Confirmatory Factor Analysis (CFA) of the CORE*

| Item           | Standardized<br>Factor Loading | S.E. | <i>p</i> -value |
|----------------|--------------------------------|------|-----------------|
| Amused1        | 0.74                           | 0.04 | <.001           |
| Amused2        | 0.52                           | 0.06 | <.001           |
| Awed1          | 0.80                           | 0.03 | <.001           |
| Awed2          | 0.62                           | 0.05 | <.001           |
| Compassionate1 | 0.70                           | 0.05 | <.001           |
| Compassionate2 | 0.70                           | 0.06 | <.001           |
| Content2       | 0.72                           | 0.04 | <.001           |
| Content3       | 0.68                           | 0.05 | <.001           |
| Grateful1      | 0.67                           | 0.05 | <.001           |
| Grateful3      | 0.56                           | 0.06 | <.001           |
| Hopeful3       | 0.73                           | 0.05 | <.001           |
| Hopeful4       | 0.70                           | 0.05 | <.001           |
| Inspired1      | 0.70                           | 0.05 | <.001           |
| Inspired2      | 0.72                           | 0.05 | <.001           |
| Joyful2        | 0.49                           | 0.06 | <.001           |
| Joyful3        | 0.53                           | 0.06 | <.001           |
| Loved1         | 0.67                           | 0.05 | <.001           |
| Loved3         | 0.40                           | 0.05 | <.001           |
| Proud2         | 0.71                           | 0.05 | <.001           |
| Proud3         | 0.73                           | 0.05 | <.001           |
| Angry1         | 0.57                           | 0.06 | <.001           |
| Angry2         | 0.67                           | 0.06 | <.001           |
| Anxious1       | 0.62                           | 0.05 | <.001           |
| Anxious3       | 0.60                           | 0.05 | <.001           |
| Ashamed1       | 0.44                           | 0.06 | <.001           |
| Ashamed3       | 0.80                           | 0.04 | <.001           |
| Bored1         | 0.71                           | 0.05 | <.001           |
| Bored3         | 0.63                           | 0.06 | <.001           |
| Disgusted2     | 0.87                           | 0.04 | <.001           |
| Disgusted5     | 0.49                           | 0.06 | <.001           |
| Embarrassed1   | 0.76                           | 0.05 | <.001           |
| Embarrassed3   | 0.66                           | 0.06 | <.001           |
| Envious1       | 0.53                           | 0.05 | <.001           |
| Envious2       | 0.50                           | 0.06 | <.001           |
| Jealous1       | 0.68                           | 0.05 | <.001           |
| Jealous3       | 0.62                           | 0.05 | <.001           |
| Sad1           | 0.46                           | 0.06 | <.001           |
| Sad2           | 0.73                           | 0.06 | <.001           |

*Note.* Item names refer to item numbers from the original set of 78 items (see Table S3).

**Table S10***Study 2: Zero-Order Correlations Among Key Study Variables and Covariates (Mean Values)*

| Variable                                                | M     | SD    | CORE    | MSCEIT | STEU    | V-IQ    | Relational Conflict |
|---------------------------------------------------------|-------|-------|---------|--------|---------|---------|---------------------|
| <u>Covariates</u>                                       |       |       |         |        |         |         |                     |
| Age                                                     | 41.18 | 14.25 | .28***  | .34*** | .32***  | .38***  | -.24***             |
| Gender (M/F)                                            | 0.50  | 0.50  | .18**   | .16    | .19*    | -.04    | -.12                |
| Race/Ethnicity<br>(White/BIPOC)                         | 0.34  | 0.47  | -.03    | -.24** | .05     | -.07    | .11                 |
| Education<br>( $< 4$ -year / $\geq 4$ -<br>year degree) | 0.46  | 0.50  | -.26*** | -.17*  | -.22*   | -.00    | .18**               |
| <u>Latent Variables</u>                                 |       |       |         |        |         |         |                     |
| CORE                                                    | 0.76  | 0.20  | —       |        |         |         |                     |
| MSCEIT                                                  | 0.48  | 0.16  | .80***  | —      |         |         |                     |
| STEU                                                    | 0.50  | 0.17  | .86***  | —      | —       |         |                     |
| V-IQ                                                    | 0.59  | 0.24  | .62***  | .66*** | .67***  | —       |                     |
| Relational<br>Conflict                                  | 2.89  | 1.20  | -.41*** | -.26** | -.38*** | -.26*** | —                   |

*Note.*  $ns = 140$ -284. CORE = Core Relational Themes of Emotion (CORE) Test. MSCEIT = Mayer–Salovey–Caruso Emotional Intelligence Test; STEU = Situational Test of Emotion Understanding; V-IQ = Verbal Intelligence. Participants were randomized to receive either the MSCEIT or the STEU. For the CORE, MSCEIT, STEU, and outcomes, we entered mean values into the correlations. The reference group for binary variables is the last group in all cases.

\*  $p < .05$  \*\*  $p < .01$  \*\*\*  $p < .001$ .

## Study 2: Partial Correlation and Regression Results Using Mean Values (vs. Factor Scores)

Adjusting for verbal intelligence, the partial correlations of the CORE with MSCEIT-Understanding ( $r = .69, p < .001$ ) and the STEU ( $r = .75, p < .001$ ) decreased but remained large.

Regarding incremental validity, adding the CORE to a multiple regression model containing demographic covariates and MSCEIT-Understanding resulted in a significant increase in the  $R^2$ ,  $R^2 = .17, F(6,131) = 4.38, p < .001$ . The  $R^2$  change (131) = .07,  $p < .01$ , and the total adjusted  $R^2 = .13$ . Also, after adding the CORE, the MSCEIT-Understanding link with relational conflict became non-significant from a trend (from  $\beta = -.18, p = .06$  without to  $\beta = .15, p = .26$  with the CORE), while the CORE relationship remained significant ( $\beta = -.45, p < .01$ ).

Adding the CORE to a multiple regression model containing demographics and the STEU resulted in an increase in the  $R^2$ ,  $R^2 = .24, F(6,130) = 7.00, p < .001$ . The  $R^2$  change (130) = .04,  $p < .01$ , and the total adjusted  $R^2 = .21$ . By adding the CORE to the model, the STEU link with relational conflict became non-significant (from  $\beta = -.27, p < .01$  without to  $\beta = .07, p = .65$  with the CORE), while the CORE association remained significant ( $\beta = -.41, p < .01$ ).

Finally, we tested whether the CORE was associated with relational conflict, accounting demographic variables and verbal intelligence. Adding the CORE to a multiple regression model containing demographics and verbal intelligence scores produced an increased  $R^2$ ,  $R^2 = .20, F(6, 269) = 10.86, p < .001$ . The  $R^2$  change (269) = .06,  $p < .001$ , and the total model adjusted  $R^2 = .18$ . The CORE remained negatively associated with relational conflict ( $\beta = -.35, p < .001$ ), providing evidence of a test-criterion relationship between the CORE and relational conflict beyond shared variance with demographics and verbal intelligence.

Overall, the results of the analyses using mean values were comparable to the CFA-derived factor score results presented in the main text, and do not substantively alter our conclusions.

**Table S11***Study 3: Participant Demographic Characteristics*

| Demographic Characteristic      | % or Mean ( <i>SD</i> ) |
|---------------------------------|-------------------------|
| <b>Age</b>                      | 39.0 (8.3)              |
| <b>Gender</b>                   |                         |
| Female                          | 70.0                    |
| Male                            | 30.0                    |
| Non-Binary Identity             | 0.0                     |
| <b>Race/Ethnicity</b>           |                         |
| White/European American         | 39.3                    |
| Latinx/Hispanic                 | 28.9                    |
| Black/African American          | 28.0                    |
| Asian/Asian American            | 1.5                     |
| Multi-Racial/Multi-Ethnic       | 1.3                     |
| Native American/Alaskan Native  | 0.4                     |
| Other Identity                  | 0.4                     |
| <b>Education Level</b>          |                         |
| High School                     | 0.4                     |
| Some College                    | 4.1                     |
| Associate Degree                | 6.1                     |
| Bachelor's Degree               | 36.1                    |
| Master's Degree                 | 45.0                    |
| Professional Degree             | 5.7                     |
| Doctoral Degree                 | 2.6                     |
| <b>Percent of Time Employed</b> |                         |
| Less than 0.25                  | 0.9                     |
| 0.25 to 0.49                    | 3.3                     |
| 0.50 to 0.74                    | 16.7                    |
| 0.75 to 0.99                    | 10.0                    |
| 1.0                             | 69.1                    |
| <b>Extra Work Hours Daily</b>   |                         |
| 0 hours per day                 | 7.4                     |
| 1 hour per day                  | 16.7                    |
| 2 hours per day                 | 30.7                    |
| 3 hours per day                 | 18.7                    |
| 4 hours per day                 | 7.6                     |
| 5 hours per day                 | 7.2                     |
| 6 hours per day                 | 6.7                     |
| 7 hours per day                 | 2.0                     |
| More than 7 hours per day       | 3.0                     |
| <b>Years Working in PreK-12</b> | 11.0 (7.2)              |
| <b>School Mode</b>              |                         |
| Combination of Remote/In-Person | 52.2                    |
| Only Remote/Virtual             | 37.6                    |



|                                                        |      |
|--------------------------------------------------------|------|
| Only In-Person                                         | 8.9  |
| Other                                                  | 1.3  |
| <b>Annual Income (USD)</b>                             |      |
| Less than \$20,000                                     | 0.4  |
| \$20,000 to \$29,999                                   | 1.7  |
| \$30,000 to \$39,999                                   | 5.2  |
| \$40,000 to \$49,999                                   | 10.5 |
| \$50,000 to \$59,999                                   | 20.1 |
| \$60,000 to \$69,999                                   | 17.5 |
| \$70,000 to \$79,999                                   | 13.8 |
| \$80,000 to \$89,999                                   | 9.0  |
| \$90,000 to \$99,999                                   | 7.4  |
| \$100,000 to \$124,999                                 | 6.6  |
| \$125,000 to \$149,999                                 | 3.9  |
| \$150,000 or more                                      | 3.9  |
| <b>Roles in PreK-12 School<sup>a</sup></b>             |      |
| General Education Teacher                              | 46.1 |
| School Counselor                                       | 12.6 |
| Instructional Coach                                    | 12.6 |
| Other                                                  | 7.6  |
| Special Ed/Gifted Ed Teacher                           | 6.1  |
| Psychologist                                           | 5.4  |
| Social Worker                                          | 3.9  |
| School Principal/School Leader                         | 3.7  |
| Behavior Support Professional                          | 3.7  |
| After School Teacher                                   | 3.5  |
| Athletic Coach                                         | 3.0  |
| Administration Staff                                   | 2.8  |
| Technology Specialist                                  | 2.4  |
| Paraprofessional                                       | 2.2  |
| Librarian                                              | 1.3  |
| Nurse                                                  | 0.9  |
| <b>COVID-19 Health Impacts<sup>a</sup></b>             |      |
| I have been diagnosed with COVID-19.                   | 4.1  |
| I am currently ill from COVID-19.                      | 0.2  |
| I have recovered from being ill due to COVID-19.       | 7.2  |
| Someone I know has been diagnosed with COVID-19.       | 59.3 |
| Someone I know has gotten ill from COVID-19.           | 59.6 |
| Someone I know has died from COVID-19.                 | 32.0 |
| Someone I care about has been diagnosed with COVID-19. | 39.1 |
| Someone I care about has gotten ill from               | 35.2 |

COVID-19.

|                                    |      |
|------------------------------------|------|
| Someone I care about has died from | 13.3 |
|------------------------------------|------|

COVID-19.

|                         |      |
|-------------------------|------|
| None of the Above Apply | 17.2 |
|-------------------------|------|

|                   |     |
|-------------------|-----|
| Rather Not Answer | 2.6 |
|-------------------|-----|

---

*Note.*  $N = 461$ .

<sup>a</sup>Select all that apply. Percent equals greater than 100.

### **Study 3: Results from a Two-Factor CFA of the Brief-COPE**

The two-factor CFA of the Brief-COPE<sup>1</sup> showed adequate model fit,  $\chi^2(43) = 175.49, p < .001$ ; RMSEA = .07; CFI = .88; SRMR = .05. For adaptive coping, standardized factor loadings ranged from .42 (emotional support) to .64 (problem solving). For maladaptive coping, standardized factor loadings ranged from .38 (self-blame) to .76 (behavioral disengagement). Adaptive and maladaptive coping were uncorrelated ( $r = -.09, p = .12$ ). The model was retained.

### **Study 3: Results from a One-Factor CFA of New Emotional Labor Scale for Educators**

As the emotional labor scale contained three items, a one-factor CFA was just-identified, and so fit statistics were not available. However, the standardized factor loadings were high, and ranged from .70 to .73. Based on this information, we retained our model of emotional labor.

### **Study 3: Results from a One-Factor CFA of the Compassion Satisfaction and Fatigue Scale (CSF) (Abbreviated)**

A one-factor CFA of a five-item version of the CSF showed good model fit,  $\chi^2(5) = 2.79, p = .73$ ; RMSEA = .01; CFI = .99; SRMR = .01. Standardized factor loadings were high, and ranged from .72 to .79. These results support the structural validity of the abbreviated CSF.

### **Study 3: Partial Correlation and Regression Results Using Mean Values (vs. Factor Scores)**

The results of the multiple regression analysis, including demographic covariates in the model, indicated that the CORE was positively associated with adaptive coping ( $\beta = .18, p < .01$ ), job satisfaction ( $\beta = .26, p < .001$ ), meaning and purpose ( $\beta = .38, p < .001$ ), and a malleable emotion mindset ( $\beta = .41, p < .001$ ) (see Table S12 for zero-order correlations). Also, the CORE was negatively associated with maladaptive coping ( $\beta = -.43, p < .001$ ), emotional exhaustion ( $\beta = -.13, p = .03$ ), and compassion fatigue ( $\beta = -.40, p < .001$ ). Counter to prediction,

---

<sup>1</sup> Religion, distraction, and venting strategies were not included in the final model due to factor loadings  $\leq 0.20$ .

the CORE was positively related to emotional labor ( $\beta = .27, p < .001$ ; an effect also found using factor scores). The emotional exhaustion effect was not significant with factor scores, but it was with mean values. Given that factor scores more accurately estimate model error and item-level variance (Rdz-Navarro et al., 2019), we retain the factor score results and conclusions.

Also, adding the CORE to a multiple regression with demographics and the STEU-B resulted in a significant increase in  $R^2$  for six of the eight outcomes (see Tables S12 and S13). The CORE effects remained significant in expected directions (with the STEU-B in the model) for job satisfaction, meaning and purpose, a malleable emotion mindset, and maladaptive coping and compassion fatigue, supporting its incremental validity. The effects for emotional exhaustion were not significant for either the CORE or the STEU-B. The emotional labor effect (in the reverse direction) was still significant for the CORE, but no longer significant for the STEU-B. It is worth noting that the STEU-B was significantly associated with five outcomes (absent the CORE), but with the CORE in the model, these effects all became smaller or non-significant.

In summation, as with Study 2, the Study 3 results using mean values were comparable to the factor score results in the main text, and they do not meaningfully change our conclusions.

**Table S12***Study 3: Zero-Order Correlations Among Key Study Variables and Covariates (Mean Values)*

| Variable                                   | EU Ability Measures |      |         |         | Coping          |                    |                      | Well-Being Measures |                 |                    |                     |                 |
|--------------------------------------------|---------------------|------|---------|---------|-----------------|--------------------|----------------------|---------------------|-----------------|--------------------|---------------------|-----------------|
|                                            | M                   | SD   | CORE    | STEU-B  | Adaptive Coping | Maladaptive Coping | Emotional Exhaustion | Job Satisfaction    | Emotional Labor | Compassion Fatigue | Meaning and Purpose | Emotion Mindset |
| <u>Covariates</u>                          |                     |      |         |         |                 |                    |                      |                     |                 |                    |                     |                 |
| Age                                        | 39.01               | 8.34 | .30***  | .39***  | -.01            | -.30***            | .03                  | .06                 | .17***          | -.11*              | .09                 | .20***          |
| Gender (M/F)                               | 0.70                | 0.46 | .33***  | .41***  | .07             | -.30***            | .11*                 | .03                 | .16***          | -.21***            | .05                 | .16***          |
| Race/Ethnicity (White/BIPOC)               | 0.61                | 0.49 | -.59*** | -.71*** | -.14**          | .41***             | -.21***              | .01                 | -.33***         | .18***             | -.17***             | -.30***         |
| Education (< Master’s Degree / ≥ Master’s) | 0.53                | 0.50 | .41***  | .45***  | .12**           | -.31***            | .18***               | -.03                | .27***          | -.03               | .09                 | .22***          |
| Income                                     | 6.57                | 2.40 | .06     | .07     | -.02            | -.07               | .18***               | -.03                | .12*            | .07                | .05                 | .03             |
| <u>EU Ability Measures</u>                 |                     |      |         |         |                 |                    |                      |                     |                 |                    |                     |                 |
| CORE                                       | 0.73                | 0.25 | —       |         |                 |                    |                      |                     |                 |                    |                     |                 |
| STEU-B                                     | 0.44                | 0.24 | .85***  | —       |                 |                    |                      |                     |                 |                    |                     |                 |
| <u>Coping</u>                              |                     |      |         |         |                 |                    |                      |                     |                 |                    |                     |                 |
| Adaptive Coping                            | 3.28                | 0.62 | .20***  | .20***  | —               |                    |                      |                     |                 |                    |                     |                 |
| Maladaptive Coping                         | 2.45                | 0.84 | -.56*** | -.59*** | -.08            | —                  |                      |                     |                 |                    |                     |                 |
| <u>Well-Being Measures</u>                 |                     |      |         |         |                 |                    |                      |                     |                 |                    |                     |                 |
| Emotional Exhaustion                       | 3.57                | 1.48 | .06     | .17**   | -.04            | .16***             | —                    |                     |                 |                    |                     |                 |
| Job Satisfaction                           | 4.60                | 1.04 | .15**   | .06     | .24***          | -.12*              | -.48***              | —                   |                 |                    |                     |                 |
| Emotional Labor                            | 4.00                | 0.75 | .39***  | .44***  | .11*            | -.11*              | .25***               | .12*                | —               |                    |                     |                 |
| Compassion Fatigue                         | 2.97                | 1.18 | -.37*** | -.34*** | -.01            | .52***             | .42***               | -.17***             | .11*            | —                  |                     |                 |
| Meaning and Purpose                        | 4.09                | 0.76 | .32***  | .28***  | .35***          | -.22***            | -.19***              | .51***              | .29***          | -.18***            | —                   |                 |
| Emotion Mindset                            | 3.57                | 0.78 | .46***  | .37***  | .30***          | -.40***            | -.22***              | .23***              | .17***          | -.32***            | .41***              | —               |

*Note.* *ns* = 306-460. EU = emotion understanding. CORE = Core Relational Themes of Emotion Test. STEU-B = Situational Test of Emotion Understanding-Brief. Emotion Mindset = malleable versus fixed emotion mindset. For the CORE, STEU-B, and outcome variables, we entered mean values into the correlations. The reference group for binary variables is the last group in all cases.

\*  $p < .05$  \*\*  $p < .01$  \*\*\*  $p < .001$ .

**Table S13***Study 3: Multiple Regression Analyses Testing Incremental Validity of the CORE Above**Demographics and the STEU-B with Outcomes Measuring Adaptive Functioning (Mean Values)*

| Step          | DV: Adaptive Coping     |         |     | DV: Job Satisfaction |           |     | DV: Meaning and Purpose  |            |     | DV: Emotion Mindset       |            |     |
|---------------|-------------------------|---------|-----|----------------------|-----------|-----|--------------------------|------------|-----|---------------------------|------------|-----|
|               | $\beta$                 | $t$     | SE  | $\beta$              | $t$       | SE  | $\beta$                  | $t$        | SE  | $\beta$                   | $t$        | SE  |
| <i>Step 1</i> |                         |         |     |                      |           |     |                          |            |     |                           |            |     |
| (Constant)    |                         | 14.65   | .21 |                      | 9.83      | .39 |                          | 12.71      | .28 |                           | 12.24      | .27 |
| Age           | -.03                    | -0.54   | .01 | .08                  | 1.15      | .01 | -.02                     | -0.28      | .01 | .01                       | 0.10       | .01 |
| Gender        | .07                     | 1.11    | .08 | .04                  | 0.61      | .14 | -.05                     | -0.74      | .10 | .02                       | 0.29       | .10 |
| Race          | .09                     | 1.10    | .10 | .09                  | 1.13      | .18 | .06                      | 0.79       | .13 | -.07                      | -0.95      | .13 |
| Education     | .10                     | 1.50    | .08 | -.11                 | -1.61     | .14 | -.02                     | -0.27      | .10 | .02                       | 0.28       | .10 |
| Income        | -.11                    | -1.78   | .02 | -.02                 | -0.38     | .03 | .03                      | 0.44       | .02 | -.08                      | -1.39      | .02 |
| STEU-B        | .20*                    | 2.33    | .21 | .13                  | 1.50      | .38 | .35***                   | 4.17       | .27 | .30***                    | 3.63       | .26 |
| $R^2$         |                         | .06     |     |                      | .02       |     |                          | .08        |     |                           | .14        |     |
| <i>Step 2</i> |                         |         |     |                      |           |     |                          |            |     |                           |            |     |
| (Constant)    |                         | 13.37   | .23 |                      | 8.27      | .41 |                          | 10.74      | .29 |                           | 10.16      | .27 |
| Age           | -.03                    | -0.53   | .01 | .08                  | 1.16      | .01 | -.02                     | -0.25      | .01 | .01                       | 0.15       | .01 |
| Gender        | .07                     | 1.14    | .08 | .05                  | 0.80      | .14 | -.04                     | -0.62      | .10 | .03                       | 0.46       | .09 |
| Race          | .10                     | 1.20    | .10 | .12                  | 1.41      | .18 | .10                      | 1.27       | .13 | -.03                      | -0.44      | .12 |
| Education     | .09                     | 1.40    | .08 | -.13                 | -1.88     | .14 | -.04                     | -0.66      | .10 | -.01                      | -0.15      | .09 |
| Income        | -.10                    | -1.71   | .02 | -.01                 | -0.12     | .03 | .04                      | 0.71       | .02 | -.06                      | -1.14      | .02 |
| STEU-B        | .11                     | 0.94    | .29 | -.12                 | -0.93     | .54 | .00                      | 0.01       | .37 | -.10                      | -0.90      | .35 |
| CORE          | .11                     | 1.07    | .12 | .31**                | 2.82      | .22 | .45***                   | 4.45       | .15 | .51***                    | 5.22       | .14 |
| $R^2 / R^2$   |                         | .06/.00 |     |                      | .05/.03** |     |                          | .14/.06*** |     |                           | .21/.07*** |     |
| change        |                         |         |     |                      |           |     |                          |            |     |                           |            |     |
|               | $F(7, 297) = 2.85^{**}$ |         |     | $F(7, 293) = 2.16^*$ |           |     | $F(7, 297) = 6.92^{***}$ |            |     | $F(7, 297) = 11.47^{***}$ |            |     |

*Note.* STEU-B = Situational Test of Emotional Understanding-Brief; CORE = Core Relational Themes of Emotion Test. Emotion Mindset = malleable versus fixed emotion mindset. For the CORE, STEU-B, and outcome variables, we entered mean values into the regression models. A separate regression model was conducted for each outcome given the intercorrelations between variables. Gender (male = 0, female = 1); race (White = 0, BIPOC = 1); and education (less than four-year college degree = 0, 1 = four-year college degree or higher). The reference group for binary variables is the last group in all cases.

\*  $p < .05$  \*\*  $p < .01$  \*\*\*  $p < .001$ .

**Table S14**

*Study 3: Multiple Regression Testing Incremental Validity of the CORE Above Demographics*

*and the STEU-B with Outcomes Measuring Maladaptive Functioning (Mean Values)*

| Step          | DV: Maladaptive Coping    |            |     | DV: Emotional Exhaustion |         |     | DV: Emotional Labor       |            |     | DV: Compassion Fatigue   |            |     |
|---------------|---------------------------|------------|-----|--------------------------|---------|-----|---------------------------|------------|-----|--------------------------|------------|-----|
|               | $\beta$                   | $t$        | SE  | $\beta$                  | $t$     | SE  | $\beta$                   | $t$        | SE  | $\beta$                  | $t$        | SE  |
| <i>Step 1</i> |                           |            |     |                          |         |     |                           |            |     |                          |            |     |
| (Constant)    |                           | 15.11      | .24 |                          | 6.78    | .51 |                           | 13.53      | .25 |                          | 8.77       | .40 |
| Age           | -.04                      | -0.83      | .01 | -.15*                    | -2.31   | .01 | -.04                      | -0.61      | .01 | -.02                     | -0.38      | .01 |
| Gender        | -.17**                    | -3.35      | .09 | .05                      | 0.85    | .19 | .00                       | 0.03       | .09 | -.12                     | -1.96      | .15 |
| Race          | .01                       | 0.09       | .12 | -.08                     | -0.98   | .24 | .00                       | 0.04       | .12 | .08                      | 1.00       | .19 |
| Education     | -.09                      | -1.71      | .09 | .07                      | 1.07    | .19 | .09                       | 1.45       | .09 | .11                      | 1.73       | .15 |
| Income        | -.01                      | -0.12      | .02 | .22***                   | 3.69    | .04 | .05                       | 0.97       | .02 | .08                      | 1.29       | .03 |
| STEU-B        | -.46***                   | -6.67      | .24 | .10                      | 1.13    | .50 | .41***                    | 5.15       | .24 | -.28**                   | -3.41      | .39 |
| $R^2$         |                           | .39        |     |                          | .09     |     |                           | .20        |     |                          | .15        |     |
| <i>Step 2</i> |                           |            |     |                          |         |     |                           |            |     |                          |            |     |
| (Constant)    |                           | 15.72      | .25 |                          | 6.82    | .55 |                           | 11.59      | .26 |                          | 9.74       | .42 |
| Age           | -.04                      | -0.88      | .01 | -.15*                    | -2.32   | .01 | -.04                      | -0.62      | .01 | -.02                     | -0.39      | .01 |
| Gender        | -.17***                   | -3.52      | .09 | .05                      | 0.76    | .19 | .02                       | 0.26       | .09 | -.13*                    | -2.25      | .15 |
| Race          | -.02                      | -0.29      | .11 | -.09                     | -1.11   | .24 | .03                       | 0.38       | .12 | .05                      | 0.65       | .19 |
| Education     | -.08                      | -1.42      | .09 | .08                      | 1.19    | .19 | .07                       | 1.15       | .09 | .13*                     | 2.10       | .15 |
| Income        | -.02                      | -0.33      | .02 | .21***                   | 3.55    | .04 | .07                       | 1.31       | .02 | .06                      | 0.96       | .03 |
| STEU-B        | -.22*                     | -2.37      | .32 | .21                      | 1.76    | .71 | .13                       | 1.16       | .34 | .03                      | 0.25       | .55 |
| CORE          | -.31***                   | -3.65      | .13 | -.15                     | -1.36   | .28 | .35***                    | 3.57       | .14 | -.39***                  | -3.80      | .22 |
| $R^2/R^2$     |                           | .41/.03*** |     |                          | .09/.01 |     |                           | .24/.03*** |     |                          | .19/.04*** |     |
| change        | $F(7, 297) = 29.80^{***}$ |            |     | $F(7, 293) = 4.35^{***}$ |         |     | $F(7, 293) = 12.90^{***}$ |            |     | $F(7, 293) = 9.53^{***}$ |            |     |

*Note.* STEU-B = Situational Test of Emotional Understanding-Brief; CORE = Core Relational Themes of Emotion Test. For the CORE, STEU-B, and outcome variables, we entered mean values into the regression models. A separate regression model was conducted for each outcome given the intercorrelations between the variables. Gender (male = 0, female = 1); race (White = 0, BIPOC = 1); and education (less than four-year college degree = 0, 1 = four-year college degree or higher). The reference group for binary variables is the last group in all cases.

$p < .05$  \*\*  $p < .01$  \*\*\*  $p < .001$ .

### **Study 3: Regression Analyses Probing the Race–CORE Association**

In Study 3, BIPOC identity was negatively related to CORE performance. We probed this result. As in prior EI research (Joseph and Newman, 2010; Mayer et al., 2008ab), in Study 3, age, female gender, and education level were moderately positively associated with CORE performance. Yet, in Study 3, BIPOC identity was negatively related to age, female gender, and education, which may have contributed to the inverse race–CORE association. Also, BIPOC participants were more likely to work part-time, but engage in a greater number of “extra hours” of (unpaid) work, as well as to report severe impacts from COVID-19 (i.e., they contracted the virus and/or a loved one fell sick and/or died from it). These additional stressors may have increased time pressure, sleep problems, or other variables that impact test performance (Pascoe et al., 2020; Shields et al., 2016). To explore this possibility, we conducted a multiple regression model (controlling for age, gender, education, work hours, extra work hours, and COVID-19 impact). The inverse association between BIPOC identity and CORE performance decreased but remained significant (from  $\beta = -.64$  to  $\beta = -.42$ ,  $ps < .001$ ). This effect size is similar to the few studies that report links between race and EU ability (Chan et al., 2014; Fiori and Antonakis, 2011; Joseph and Newman, 2010). Additionally, BIPOC identity showed a similar-sized negative association with the STEU-B in Study 3. To test whether the CORE was uniquely related to race, we re-ran the same multiple regression with the same demographic covariates including the STEU-B in the model, and then BIPOC identity only showed a small inverse association with the CORE ( $\beta = -.12$ ,  $p < .01$ ). The link between race and the CORE may be a more general link between EI or EU ability tests and race (Joseph and Newman, 2010). That said, in Study 2, race was inversely related to the MSCEIT-Understanding subtest, but was unrelated to the CORE or STEU, so more research is needed to determine how and when race and EU ability are related.



## References

- Chan, Kevin, Brad Petrisor, and Mohit Bhandari. 2014. Emotional intelligence in orthopedic surgery residents. *Canadian Journal of Surgery* 57: 89-93.  
<https://doi.org/10.1503/cjs.022512>
- Fiori, Marina, and John Antonakis. 2011. The ability model of emotional intelligence: Searching for valid measures. *Personality and Individual Differences* 50: 329-334.  
<https://doi.org/10.1016/j.paid.2010.10.010>
- Joseph, Dana L., and Daniel A. Newman. 2010. Emotional intelligence: An integrative meta-analysis and cascading model. *Journal of Applied Psychology* 95: 54-78.  
<https://doi.org/10.1037/a0017286>
- Mayer, John D., Peter Salovey, and David R. Caruso. 2008a. Emotional intelligence: New ability or eclectic traits? *American Psychologist* 63: 503-17. <https://doi.org/10.1037/0003-066X.63.6.503>
- Mayer, John D., Richard D. Roberts, and Sigal G. Barsade. 2008b. Human abilities: Emotional intelligence. *Annual Review of Psychology* 59: 507-36.  
<https://doi.org/10.1146/annurev.psych.59.103006.093646>
- Pascoe, Michaela C., Sarah E. Hetrick, and Alexandra G. Parker. 2020. The impact of stress on students in secondary school and higher education. *International Journal of Adolescence and Youth* 25: 104-112. <https://doi.org/10.1080/02673843.2019.1596823>
- Rdz-Navarro, Karina. 2019. Latent variables should remain as such: Evidence from a Monte Carlo study. *The Journal of General Psychology* 146: 417-42.  
<https://doi.org/10.1080/00221309.2019.1596064>
- Shields, Grant S., Matthew A. Sazma, and Andrew P. Yonelinas. 2016. The effects of acute stress on core executive functions: A meta-analysis and comparison with cortisol. *Neuroscience & Biobehavioral Reviews* 68: 651-668.  
<https://doi.org/10.1016/j.neubiorev.2016.06.038>
